1 **New tools for evaluating protein tyrosine sulphation: Tyrosyl Protein**  
2 **Sulphotransferases (TPSTs) are novel targets for RAF protein kinase inhibitors**

3 Dominic P Byrne\*, Yong Li\*, Pawin Ngamlert\*, Krithika Ramakrishnan\*, Claire E Eyers\*§, Carrow  
4 Wells^, David H Drewry^, William J Zuercher^†, Neil G Berry‡, David G Fernig\* and Patrick A  
5 Eyers\*||

6 \* Department of Biochemistry, Institute of Integrative Biology, University of Liverpool, L69 7ZB,  
7 UK

8 § Centre for Proteome Research, Institute of Integrative Biology, University of Liverpool, L69 7ZB,  
9 UK

10 ^Structural Genomics Consortium, UNC Eshelman School of Pharmacy, University of North Carolina  
11 at Chapel Hill, Chapel Hill, NC, 27599, USA

12 † Lineberger Comprehensive Cancer Center, University of North Carolina at Chapel Hill, Chapel Hill,  
13 NC 27599, USA

14 ‡ Department of Chemistry, University of Liverpool, L69 7ZD, UK

15 || Correspondence to [Patrick.eyers@liverpool.ac.uk](mailto:Patrick.eyers@liverpool.ac.uk)

16

17 **ABSTRACT:**

18 Protein tyrosine sulphation is a post-translational modification (PTM) best known for regulating  
19 extracellular protein-protein interactions. Tyrosine sulphation is catalysed by two Golgi-resident  
20 enzymes termed Tyrosyl Protein Sulpho Transferases (TPSTs) 1 and 2, which transfer sulphate from  
21 the co-factor PAPS (3'-phosphoadenosine 5'-phosphosulphate) to a context-dependent tyrosine in a  
22 protein substrate. A lack of quantitative tyrosine sulphation assays has hampered the development of  
23 chemical biology approaches for the identification of small molecule inhibitors of tyrosine sulphation.  
24 In this paper, we describe the development of a non-radioactive mobility-based enzymatic assay for  
25 TPST1 and TPST2, through which the tyrosine sulphation of synthetic fluorescent peptides can be  
26 rapidly quantified. We exploit ligand binding and inhibitor screens to uncover a susceptibility of  
27 TPST1 and 2 to different classes of small molecules, including the anti-angiogenic compound suramin  
28 and the kinase inhibitor rottlerin. By screening the Published Kinase Inhibitor Set (PKIS), we  
29 identified oxindole-based inhibitors of the Ser/Thr kinase RAF as low micromolar inhibitors of  
30 TPST1/2. Interestingly, unrelated RAF inhibitors, exemplified by the dual BRAF/VEGFR2 inhibitor  
31 RAF265, were also TPST inhibitors *in vitro*. We propose that target-validated protein kinase  
32 inhibitors could be repurposed, or redesigned, as more-specific TPST inhibitors to help evaluate the  
33 sulphytyrosyl proteome. Finally, we speculate that mechanistic inhibition of cellular tyrosine  
34 sulphation might be relevant to some of the phenotypes observed in cells exposed to anionic TPST  
35 ligands and RAF protein kinase inhibitors.

36 **SHORT TITLE:** New enzyme assays and inhibitors for Tyrosyl Protein Sulpho Transferases  
37 (TPSTs).

38 **ABBREVIATIONS:** **DSF:** Differential Scanning Fluorimetry; **PAP:** 3'-phosphoadenosine 5'-  
39 phosphate; **PAPS:** 3'-phosphoadenosine 5'-phosphosulphate; **PKIS:** Published Kinase Inhibitor Set;  
40 **RAF:** Rapidly Accelerated Fibrosarcoma; **TPST:** Tyrosyl Protein Sulpho Transferase; **TSA:** Thermal  
41 Stability Assay

42 **KEYWORDS:** TPST1, TPST2, kinase inhibitor, PAPS, screening, enzyme, RAF, tyrosine,  
43 sulphotransferase

44 **SUMMARY STATEMENT:** We develop new assays to quantify tyrosine sulphation by the human  
45 tyrosine sulphotransferases TPST1 and 2. TPST1 and 2 catalytic activities are inhibited by protein  
46 kinase inhibitors, suggesting new starting points to synthesise (or repurpose) small molecule  
47 compounds to evaluate biological TPST using chemical biology.

48 **WORD COUNT INCLUDING REFERENCES: 11,774**

49

50 **INTRODUCTION:**

51 Like tyrosine phosphorylation [1], reversible tyrosine sulphation is a critical covalent modification  
52 that occurs on proteins post-translationally [2]. Originally identified more than half a century ago in  
53 sulphated fibrinogen and gastrin [3], tyrosine sulphation occurs on a wide range of secreted  
54 polypeptides in multicellular eukaryotes, and constitutes the transfer of a negatively charged sulphate  
55 group from the sulphate donor PAPS (3'-phosphoadenosine-5'-phosphosulphate) to a phenolic  
56 tyrosine residue. Tyrosine sulphation is catalyzed by two Golgi-associated membrane enzymes termed  
57 Tyrosyl Protein Sulpho Transferase 1 and 2 (TPST1 and 2), and sulphation leads to biologically-  
58 relevant changes in a large number of protein activities [2]. For example, sulphation can change the  
59 affinity of extracellular protein-protein interactions, such as those involved in chemotaxis [4] and  
60 host-pathogen interactions [5]. It also controls the proteolytic processing of both bioactive peptides [6,  
61 7] and secreted antibodies [8], and multi-site tyrosine sulphation can change the function of several  
62 blood-coagulation regulators, including factor VIII [9, 10]. Interest in the pathophysiological analysis  
63 and therapeutic targeting of tyrosine sulphation was heightened by the finding that N-terminal  
64 chemokine receptor tyrosine sulphation in the HIV G-protein coupled receptor CCR5 [11, 12] plays a  
65 crucial role in coat binding and viral infection. Earlier studies had implicated tyrosine sulphation in  
66 the proteolytic control of the complement cascade component through decreased activity of C4 [13],  
67 the generation of gastrin from progastrin [14], and in regulating the binding of amino terminal  
68 sulphated P-selectin glycoprotein ligand-1 (PSGL-1) to P-selectin [15]. Interestingly, the binding of  
69 L-selectin on lymphocytes to mucin-like glycoproteins on endothelial cells is also regulated by  
70 sulphation, although the sialyl LewisX surface antigen is modified by a distinct carbohydrate 6-O  
71 sulphotransferase [16].

72

73 TPST1 was originally purified from bovine adrenal medulla [17, 18], and distinct human TPST1 and  
74 TPST2 genes have been cloned [19], with expression patterns varying markedly in both cells and  
75 tissues [20-22]. Both enzymes are believed to reside in the trans-Golgi compartment of the secretory  
76 pathway, and as type II transmembrane-containing enzymes with >85% sequence similarity in the  
77 intracellular catalytic domains, which are luminal-facing for substrate modification [19, 21, 22].  
78 TPSTs interact with the sulphate-donor cofactor PAPS and an appropriate (often acidic) tyrosine-  
79 containing protein substrate. Recent experiments suggest that TPST1 and TPST2 might function as  
80 homo or heterodimers [23, 24], providing regulatory opportunities for the control of site-specific  
81 sulphation amongst substrates. In general, tyrosine sulphation occurs in an acidic context in proteins  
82 and model substrates [2, 18, 24-26], although some, including the bioactive protein gastrin, lack acid  
83 residues adjacent to the site of sulphation [14]. Analysis of a variety of synthetic peptides and intact  
84 proteins confirms that TPST1 and TPST2 can also control site-specific sulphation on multiple tyrosine  
85 residues, which are often clustered, consistent with a processive mechanism of modification [7, 27],

86 or directionally distributed towards the substrate N-terminus [20, 28]. Crystal structures of TPST1  
87 complexed with substrate peptides that are sulphated with different efficiencies have also been  
88 reported, and comparative analysis suggests differential substrate preferences for acidic residues  
89 adjacent to the site of modification [24, 29]. Structural comparison suggests a shared catalytic  
90 mechanism and substrate-binding energetics, driven by charge-based dynamic interactions.  
91 Bioinformatics analysis hints at a substantial and complex tyrosine sulphoproteome [30, 31] so  
92 uncovering the extent, substrate determinants and biological function of tyrosine-sulphated proteins  
93 remains a high priority technical challenge for Mass Spectrometry (MS)-based proteomics [32].

94

95 The analysis of tyrosine sulphation currently relies heavily on genetic and relatively low-throughput  
96 MS-based analysis, and only a few low-affinity inhibitors of TPSTs have ever been reported.  
97 Moreover, due to a lack of chemical tool compounds, biological sulphation remains highly  
98 understudied in general, relying on non-specific cytotoxic compounds such as chlorate with which to  
99 induce non-specific effects on sulphation [33]. The similarity between the sulphotransferase co-factor  
100 PAPS, and the phosphate donor ATP (utilised by protein kinases) raises questions as to whether  
101 PAPS-dependent sulphotransferases might be broad inhibitory targets for new or repurposed small  
102 molecules that target nucleotide-binding sites, especially well-studied families of compounds such as  
103 protein kinase inhibitors. Moreover, the mode of substrate peptide recognition observed in substrate-  
104 and co-factor bound TPST2 structures closely resembles that established for the insulin-receptor  
105 tyrosine kinase bound to a tyrosine-containing (YMXM) substrate and ATP analogue [34], inviting  
106 further comparison between TPSTs and the highly druggable protein kinase superfamily [35, 36].

107 Analysis of TPST-based catalysis using small molecules remains in its infancy, and is currently  
108 hampered by a lack of rapid, flexible and reliable assays with which to screen for suitable inhibitors.  
109 Conventional procedures employ <sup>35</sup>S-based detection of sulphated tyrosine in synthetic peptides [18,  
110 21, 37] or, increasingly, rely on gas phase Mass Spectrometric (MS)-based detection of sulphated  
111 peptides [38-40]. Both of these approaches have technical drawbacks, and can be time-consuming,  
112 although <sup>35</sup>S-based peptide sulphation by TPST2 was used to discover the first low-affinity reversible  
113 TPST2 inhibitors from a combinatorial library of aldehyde-linked heterocyclic compounds [37].  
114 Recently, indirect fluorescent assays have been reported, including a PAPS depletion/reconstitution  
115 approach to monitor sulphate transfer [28] and continuous TPST1 and 2 assays reporting  
116 fluorescence-induced peptide sulphation [40]. The latter approach monitors peptide sulphation over  
117 relatively long periods of time, and requires inflexible positioning of the fluorophore relative to the  
118 modified tyrosine and flanking amino acid sulphation determinants. Nonetheless, such assays can be  
119 employed to discover small molecule inhibitors in screens, with several anionic compounds recently  
120 identified and cross-validated from commercial libraries [40, 41].

121 In this paper, we describe novel differential scanning fluorimetry (DSF) and sulphation assays that

122 permit real time analysis of TPST1 and TPST2-mediated peptide sulphation, allowing us to evaluate  
123 TPST interactions with a variety of ligands and small molecule inhibitors. PAPS-dependent  
124 sulphation of peptides leads to a charge-induced mobility change, driven through intrinsic properties  
125 of a sulphonyl-tyrosine-containing substrate. Sulphation is detected by real-time mobility shift using a  
126 fluorescent microfluidic assay originally developed for the detection of peptide tyrosine  
127 phosphorylation [42]. In conjunction with analytical DSF, we also screened kinase inhibitor libraries,  
128 identifying a variety of known ligands as new TPST1 and TPST2 inhibitors, including the  
129 promiscuous protein kinase inhibitor rottlerin and a family of oxindole-based RAF kinase inhibitors  
130 from the Published Kinase Inhibitor Set (PKIS). In a related paper, published back-to-back with this  
131 study, we demonstrate that some of these compounds also inhibit the oligosaccharide  
132 sulphotransferase activity of Heparan Sulphate 2-O transferase (HS2ST), a related PAPS-dependent  
133 enzyme. Finally, chemically distinct inhibitors with activity towards the proto-oncogenic kinase RAF,  
134 exemplified by the dual BRAF/VEGFR2 inhibitor RAF265 (CHIR-265), were discovered to be more  
135 specific TPST inhibitors *in vitro*. We propose that target-validated kinase inhibitors might be  
136 chemically repurposed, or redesigned, to create new classes of TPST inhibitor. Moreover, we  
137 speculate that inhibition of cellular tyrosine sulphation by some of these compounds might contribute  
138 to the phenotypes observed in cells exposed to RAF kinase inhibitors.

139

140

141 **EXPERIMENTAL:**

142 **MATERIALS AND METHODS:**

143 **Chemicals and Compounds**

144 All standard biochemicals were purchased from either Melford or Sigma, and were of the highest  
145 analytical quality that could be obtained. PAPS (adenosine 3'-phosphate 5'-phosphosulphate, lithium  
146 salt hydrate), APS (Adenosine 5'-phosphosulphate, sodium salt), PAP (adenosine 3'-5'-diphosphate,  
147 disodium salt), CoA (coenzymeA, sodium salt) dephosphoCoA (3'-dephosphoCoA, sodium salt  
148 hydrate), ATP (adenosine 5'-triphosphate, disodium salt hydrate) ADP (adenosine 5'-diphosphate,  
149 disodium salt), AMP (adenosine 5'-monophosphate, sodium salt), GTP (guanosine 5'-triphosphate,  
150 sodium salt hydrate), GDP (guanosine 5'-diphosphate, sodium salt) or cAMP (adenosine 3',5'-cyclic  
151 monophosphate, sodium salt) were all purchased from Sigma and stored at -80°C to ensure maximal  
152 stability. Rottlerin, surmain, aurintricarboxylic acid and all named kinase inhibitors were purchased  
153 either from Sigma, BD laboratories, Selleck or Tocris.

154 **Cloning, protein purification and protein analysis**

155 Human TPST1 (residues Lys43-Leu360) and TPST2 (residues Gly43-Leu359) enzymes lacking the  
156 transmembrane domains were amplified by PCR and cloned into pOPINF (OPPF-UK) to produce  
157 recombinant protein containing an N-terminal 6xHis tag and a 3C protease cleavage site.  
158 Recombinant TPST proteins were expressed in BL21 (DE3) pLysS *E. coli* (Novagen) with 0.4 mM  
159 IPTG for 18 h at 37°C and isolated from inclusion bodies and refolded as previously described [43].  
160 In brief, cells were resuspended in 3 ml ice-cold lysis buffer (50 mM Tris-HCl, pH 8.0; 10 mM  
161 MgCl<sub>2</sub>; and 1 mM DTT supplemented with cOmplete, EDTA-free protease inhibitor cocktail tablets  
162 (Roche) per gram of *E. coli* cell pellet, and flash frozen with liquid nitrogen. Cells were disrupted by  
163 sonication, inclusion bodies were collected by centrifugation for 1 h at 10,000 x g at 4 °C and washed  
164 in ice-cold WB1 (50 mM Tris-HCl, pH 8.0; 100 mM NaCl; 10 mM EDTA and 1 % (v/v) Triton X-  
165 100) followed by WB2 (20 mM Tris-HCl, pH 8.0; 200 mM NaCl and 1 mM EDTA). Inclusion bodies  
166 were resuspended in SB (100 mM Tris-HCl, pH 8.0; 6 M GndHCl; 5 mM EDTA and 10 mM DTT)  
167 and incubated at 4 °C with constant agitation. SB buffer was supplemented with fresh DTT (10 mM  
168 DTT) after 12 h and incubated for 2 h at room temperature. Insoluble material was removed by  
169 centrifugation (1 h, 60,000 x g, 4 °C), and the supernatant was concentrated by ultrafiltration (Amicon  
170 Ultra-15 centrifugal filter unit, 10 kDa cutoff) and then diluted 10 fold with buffer A (100 mM Na-  
171 acetate, pH 4.5; 6 M GndHCl and 10 mM DTT). 5 ml of concentrated TPST (~150 mg) was slowly  
172 added (using a peristaltic pump) to 1 L of pre-chilled refolding buffer (50 mM Tris-HCl, pH 8.5; 500  
173 mM GndHCl; 10 mM NaCl; 0.4 mM KCl; 0.1 mM EDTA; 0.14 mM DDM; 5 mM GSG and 2.5 mM  
174 GSSG) while mixing with a magnetic stirrer. The refolding mixture was incubated for 20 h without

175 mixing at 4 °C and precipitated protein was removed by centrifugation. Soluble TPST protein was  
176 then purified by immobilized metal affinity chromatography and size-exclusion chromatography  
177 (SEC) using a HiLoad 16/600 Superdex 200 column (GE Healthcare) equilibrated in 50 mM Tris–  
178 HCl, pH 7.4, 100 mM NaCl, and 10% (v/v) glycerol. Glutathione-*S*-transferase (GST) tagged CC4-  
179 tide (EDFEDYEFDG) was cloned into pOPINJ (OPPF-UK) and affinity purified from BL21 (DE3)  
180 pLysS *E. coli* using Glutathione-Sepharose 4B (GE Healthcare) and size-exclusion chromatography.  
181 The tyrosine kinase EphA3, comprising the kinase domain and the juxtamembrane region with an N-  
182 terminal 6xHis-tag, was expressed in pLysS *E. coli* from pET28a LIC, and protein purified using Ni-  
183 NTA agarose and gel filtration, as described [42]. Halo-FGF7 was purified as previously described  
184 [44].

### 185 **SDS-PAGE and immunoblotting**

186 After assay, proteins were denatured in Laemmli sample buffer, heated at 95 °C for 5 min and then  
187 analysed by SDS-PAGE with 10% (v/v) polyacrylamide gels. Gels were stained and destained using a  
188 standard Coomassie Brilliant Blue protocol. To evaluate protein sulphation and phosphorylation by  
189 immunoblotting, standard western blotting procedures were followed using an anti-sulphotyrosine  
190 antibody (Millipore) in the presence of appropriate positive and negative controls, and modifications  
191 visualised using ECL reagent.

192

### 193 **DSF assays**

194 Thermal shift/stability assays (TSAs) were performed with a StepOnePlus Real-Time PCR machine  
195 (Life Technologies) using Sypro-Orange dye (Invitrogen) and thermal ramping between 20 - 95°C in  
196 0.3°C step intervals per data point to induce denaturation in the presence or absence of various  
197 biochemical and small molecule inhibitors [45, 46]. TPST1 and TPST2 were assayed at a final  
198 concentration of 5 µM in 50 mM Tris–HCl (pH 7.4) and 100 mM NaCl. Final DMSO concentration in  
199 the presence or absence of the indicated concentrations of ligand was no higher than 4% (v/v). None  
200 of the test compounds analysed in the absence of HS2ST were found to interfere with fluorescent  
201 detection of Sypro-Orange binding. Normalized data were processed using the Boltzmann equation to  
202 generate sigmoidal denaturation curves, and average  $T_m/\Delta T_m$  values were calculated as described [47]  
203 using GraphPad Prism software.

### 204 **EZ Reader II-based peptide sulphation assays**

205 Fluorescently-tagged peptides used in TPST sulphotransferase assays were derived from the human  
206 physiological substrate sequences where noted. A 5-FAM fluorophore, with maximal absorbance of  
207 495 nm and a maximal emission absorbance of 520 nm that could be detected in an EZ Reader *via*  
208 LED-induced fluorescence, was covalently coupled to the free N-terminus of each peptide. CC4-tide  
209 (5-FAM-EDFEDYEFDG-CONH<sub>2</sub> and the equivalent peptide lacking the single acceptor tyrosine

210 residue, 5-FAM-EDFEDFEFDG-CONH<sub>2</sub>), were modified from the human Complement C4 protein  
211 [13], Fibroblast Growth Factor 7 (FGF7, 5-FAM-ERHTRSVDYMEGGD-CONH<sub>2</sub>), C-C motif  
212 chemokine receptor 8 (CCR8, 5-FAM-TTVDYYPDIFSS-CONH<sub>2</sub>) and P-selectin glycoprotein  
213 ligand-1 (PSGL1, 5-FAM-TEYEYLDYDFLPETE-CONH<sub>2</sub>) peptides were derived from the  
214 appropriate human sequences (predicted site of tyrosine sulphation shaded in red). Peptides were  
215 synthesised using solid-phase Fmoc chemistry and after HPLC purification (>95%), the expected  
216 intact peptide mass was confirmed by MALDI-TOF Mass Spectrometry (Pepteuticals, Leicester,  
217 UK). The Perkin Elmer LabChip EZ II Reader system [48], 12-sipper chip and CR8 coating, assay  
218 separation buffer and a synthetic fluorescent Ephrin A3 substrate (Ephrin A3-tide, 5-FAM-  
219 EFPIYDLPAKK-CONH<sub>2</sub>) were all purchased from Perkin Elmer. Pressure and voltage settings were  
220 adjusted manually to afford optimal separation of tyrosine sulphated and non-sulphated peptides.  
221 Individual sulphation assays were performed in a 384 well plate in a volume of 80 µl in the presence  
222 of the indicated concentration of PAPS (Sigma-Aldrich), 50 mM HEPES, 0.015 % (v/v) Brij-35 and 5  
223 mM MgCl<sub>2</sub> (unless specified otherwise) and the degree of peptide sulphation was directly calculated  
224 by EZ Reader software by differentiating sulphopeptide:peptide ratios. The activity of TPST proteins  
225 in the presence of inhibitors was quantified by monitoring the amount of sulphopeptide generated  
226 over the assay time relative to control assay with no additional inhibitor molecule. Data was  
227 normalized with respect to these control assays, with sulphate incorporation into the peptide limited to  
228 ~ 20 % to prevent depletion of PAPS and to ensure assay linearity. *K<sub>m</sub>* and *IC*<sub>50</sub> values were  
229 determined by non-linear regression analysis using Graphpad Prism software

### 230 **Biochemical and small molecule screening by DSF and TPST enzyme assay**

231 The PKIS chemical library (designated with SB, GSK or GW prefixes) comprises 367 largely ATP-  
232 competitive kinase inhibitors, covering 31 chemotypes originally knowingly designed to inhibit 24  
233 distinct protein kinases [49, 50], was stored frozen as a 10 mM stock in DMSO at -80°C. This  
234 inhibitor library is characterised as highly drug-like (~70% with molecular weight <500 Da and clogP  
235 values <5). For initial screening, compounds pre-dissolved in DMSO were pre-incubated with TPST1  
236 or TPST2 for 10 minutes and sulphotransferase reactions initiated by the addition of the universal  
237 sulphate donor PAPS. For inhibition assays, competition assays, or individual *IC*<sub>50</sub> value  
238 determination, the appropriate compound range was prepared by serial dilution in the appropriate  
239 solvent, and added directly into the assay to the indicated final concentration. All control experiments  
240 contained 4% (v/v) DMSO.

### 241 **Molecular docking analysis.**

242 Rottlerin, GW305074X, suramin and RAF265 were built using Spartan16  
243 (<https://www.wavefun.com>) and energy minimised using the Merck molecular forcefield. GOLD 5.2



244 (CCDC Software;) was used to dock molecules [51], with the binding site defined as 10 Å around the  
245 5' phosphorous atom of PAP, using coordinates from human TPST1 PDB ID: 5WRI [24]. A generic  
246 algorithm with ChemPLP as the fitness function [52] was used to generate 10 binding-modes per  
247 ligand in HS2ST. Protons were added to the protein. Default settings were retained for the “ligand  
248 flexibility” and “fitness and search options”, however GA settings were changed manually to 200%.

249

250 **RESULTS:**

251 **Analysis of human TPST1 and TPST2 using a reliable thermal stability assay (TSA)**

252 To drive the development of new approaches to assay and inhibit protein tyrosine sulphation, we  
253 developed a Differential Scanning Fluorimetry (DSF) assay to examine the thermal stability of TPST1  
254 or TPST2 in the presence or absence of biochemical ligands (Figure 1A). We purified recombinant  
255 soluble human 6His-tagged TPST1 and 2 catalytic domains (amino acids 43-360 and 43-559  
256 respectively, lacking the transmembrane domain) from bacterial inclusion bodies to near homogeneity  
257 (Figure 1B). After refolding from guanidine hydrochloride into a Tris-based buffer, TPST thermal  
258 stability and unfolding profiles were measured in the presence of the known sulphated co-factor  
259 PAPS, or the dephosphorylated precursor APS, whose phosphorylation at the 3' position on the  
260 adenine ring by APS kinase generates PAPS in cells. Heating of TPST1 and TPST2 generated a  
261 typical heat-induced unfolding profile with both TPST1 and TPST2 exhibiting almost identical  $T_m$   
262 values (formally, the temperature at which 50% of the protein is unfolded based on fluorescence) of  
263  $\sim 40$  °C (Figure 1C, E). In both cases, inclusion of PAPS in the unfolding assay induced a shift in the  
264  $T_m$  value, suggesting that both enzymes were folded and could bind to a physiological co-factor. In  
265 the case of TPST1, PAPS (but not APS) induced a  $\Delta T_m$  value of  $\sim 3$  °C (Figures 1C, D), whereas  
266 TPST2 stability shifted by  $\sim 9$  °C in the presence of PAPS, but not APS (Figures 1E, F). Side-by-side  
267 comparison of TPST1 and TPST2 over a range of PAPS concentrations demonstrated concentration-  
268 dependent effects on TPST stability, with a more marked shift in TPST2 stability at all concentrations  
269 tested (Figure 1G). We next compared thermal unfolding in the presence of a panel of nucleotide-  
270 based cofactors. These experiments demonstrated a lack of significant thermal shift by  $Mg^{2+}$  ions,  
271 APS, AMP or cAMP. In contrast, ADP, PAP, CoA, acetyl CoA and GTP all induced marked  
272 stabilisation of both TPST1 and TPST2 at near stoichiometric concentrations in the assay, suggestive  
273 of high affinity binding. In contrast to CoA, dephospho-CoA, which lacks a 3'-phosphoadenine group,  
274 was unable to induce thermal shifts in either TPST1 or 2, as established for APS, in which the 3'  
275 phosphoadenine group is also absent. In the case of ATP, ADP and GTP, TPST1 and TPST2 shifts  
276 were abolished in the presence of  $Mg^{2+}$  ions, presumably reflecting the very high affinity of this  
277 divalent cation for these nucleotides [53] (Supplementary Figure 1A, B).

278 **A novel microfluidic assay to quantify real-time peptide sulphation by TPST1 and TPST2**

279 Thermal and enzymatic screening assays can generate complementary information to help evaluate  
280 ligand binding. [54] To extend our thermal analysis of TPST ligand binding to include real-time  
281 analysis of sulphate transfer, and help progress our eventual goal of discovering TPST1 and TPST2  
282 inhibitors, we developed a novel enzyme assay for kinetic analysis of peptide tyrosine sulphation. The  
283 basic requirement of this assay was that it should report the enzymatic incorporation of sulphate onto  
284 a tyrosine residue of a synthetic peptide substrate with a high signal-to-noise ratio and be rapid,

285 repeatable and relatively high-throughput. Current protocols to monitor tyrosine sulphation generally  
286 involve  $^{35}\text{S}$ -based enzyme regeneration or intrinsic fluorescence assays, which are often unsuitable for  
287 kinetic or high-throughput analysis using different peptide substrates, and are prone to artefacts if  
288 compounds or co-factors that interfere with fluorescence detection are employed. However, as  
289 established below, our novel assay permits rapid real-time detection of non-radioactive sulphate  
290 incorporation into synthetic peptides.

### 291 **Synthetic peptides derived from human substrates are *in vitro* TPST1 and/or TPST2 substrates**

292 To evaluate context-specific sulphation kinetics for TPST1 and 2, we synthesised a panel of peptides  
293 possessing tyrosine-containing sequences found in human proteins previously reported to be sulphated  
294 on tyrosine [2], and developed an assay to quantify peptide sulphation. The assay comprises a putative  
295 substrate peptide (containing a tyrosine in an acid context and culminating in an amide group), TPST1  
296 or TPST2 and the PAPS co-factor (Figure 2A). To facilitate the facile detection of both sulphated and  
297 non-sulphated substrates in the same assay using a microfluidic platform, we appended an N-terminal  
298 fluorophore (5-FAM) to the peptide. Since tyrosylsulphate (singly charged under the assay conditions)  
299 and tyrosylphosphate (doubly charged) are chemically similar, and can potentially induce charge-  
300 based differences in peptide mobility when covalently attached to tyrosine, we reasoned that this  
301 assay would be able to detect sulphation in a similar way to that previously established for tyrosine  
302 phosphorylation by Ser/Thr and Tyr kinases [42, 55, 56]. As shown in Figure 2B, incubation of a 5-  
303 FAM conjugated 10-mer tyrosine-containing peptide from human complement C4 protein with TPSTs  
304 led to the appearance of an electrophoretically distinct product (P) when compared with the  
305 unmodified substrate (S). Different ratios of product to substrate were detected when TPST1 or  
306 TPST2 were included in the assay, but no product was detected with buffer and PAPS alone,  
307 suggesting that the new product was a tyrosine-sulphated peptide (Figure 2B).

308 We next compared the ability of TPST1 and TPST2 to modify the CC4 peptide (termed hereafter  
309 CC4-tide) in a kinetic assay, monitoring the real-time appearance of the sulphated peptide by  
310 detecting the increase in product peak height in a duplicate assay format. As shown in Figure 2C,  
311 TPST1 was much more efficient at modifying CC4-tide, inducing near-stoichiometric modification  
312 after one hour. The rate of sulphation by TPST1, but not TPST2, was responsive to divalent cations,  
313 and could be increased 6-10 fold by including  $\text{Mg}^{2+}$  ions or  $\text{Mn}^{2+}$  ions in the buffer (Supplementary  
314 Figure 3), despite a lack of detectable  $\text{Mg}^{2+}$  binding to TPST1 (or TPST2) by DSF (Supplementary  
315 Figure 1A, B), consistent with previous studies [18, 28, 40]. In contrast, over the same time period  
316 and at the same concentration in the assay, purified TPST2 only sulphated CC4-tide to a  
317 stoichiometry of ~20%. We next assessed whether TPST1 or TPST2 sulphated a fluorescent 14-mer  
318 peptide derived from recombinant human FGF7, which contains a single known site of tyrosine  
319 sulphation corresponding to Tyr27 in the mature growth factor [57]. Using this new assay, we were

320 unable to detect FGF7-tide sulphation by TPST2, although TPST1 induced ~70% peptide sulphation  
321 over the assay time-course (Figure 2D). Interestingly, CCR8-tide, which was derived from the human  
322 CCR8 sequence, was even more rapidly sulphated by TPST1 than FGF7-tide, although it was not  
323 modified noticeably by TPST2 (Figure 2E). In marked contrast, a distinct fluorescent 14-mer  
324 sequence derived from human PSGL1 was rapidly, and stoichiometrically sulphated by TPST1 and  
325 TPST2 (Figure 2F), confirming these enzymes possess overlapping, as well as distinct, substrate  
326 specificities *in vitro*. As a test of the suitability of our assay to derive a reported kinetic parameter, we  
327 employed an appropriate concentration of TPST1 and 2 so that the degree of peptide sulphation was  
328 linear over the time course of the reaction. Under these conditions, the  $K_m$  value for PAPS in a  
329 TPST1-dependent CC4-tide assay was  $6.6 \pm 1.9 \mu\text{M}$ , (Supplementary Figure 2) consistent with  
330 previous literature reports of 2-5  $\mu\text{M}$  for TPST1 [18, 25] or 12  $\mu\text{M}$  for TPST2 obtained from  
331 transfected CHO cell medium [37] or ~5  $\mu\text{M}$  for recombinant TPST2 isolated from baculovirus [40]

### 332 **Substrate and co-factor specificity for model TPST1 and TPST2 substrates**

333 To investigate TPST site specificity, we confirmed that the single Tyr residue in CC4 represents the  
334 site of covalent modification identified in the mobility assay, by generating a peptide in which Tyr  
335 was substituted for a chemically analogous, but non-sulphatable, Phe residue. As shown in Figure 3A  
336 and B, PAPS-dependent CC4-tide sulphation likely occurs on Tyr, because the Phe-substituted  
337 peptide was not modified by incubation with TPST1 (or TPST2). To confirm sulphate and phosphate  
338 co-factor specificity in the assay, we evaluated sulphation and phosphorylation of the same CC4-tide  
339 substrate using either TPST1 or the tyrosine kinase Ephrin A3. Importantly, Ephrin A3 generated a  
340 modified (phosphorylated) CC4 product peptide in the presence of ATP, but not PAPS, whereas  
341 TPST1 generated a modified (sulphated) product peptide only in the presence of PAPS, but not ATP  
342 (Figure 3C). The electrophoretic mobility of sulphated (TPST1-generated) or phosphorylated (EphA3-  
343 generated) CC4 peptides relative to the non-modified peptide was very similar in our microfluidic  
344 assay conditions, consistent with similar physiochemical properties of anionic sulphotyrosine and  
345 phosphotyrosine formed in the assay. Finally, we confirmed the reported preference for tyrosine  
346 sulphation of peptide substrates in the context of an N-terminal acidic residues (which is targeted  
347 electrostatically to the cationic active site) by showing that a tyrosine kinase (TK) peptide substrate  
348 optimised for EphA3 phosphorylation was not modified by TPST1 or TPST2, presumably because it  
349 lacked an acidic residue at the -1 position relative to Tyr, although this did not prevent  
350 phosphorylation by EphA3 kinase in the presence of Mg-ATP (Figure 3D).

### 351 **TPST1 and TPST2 sulphate tyrosine in recombinant sulphoacceptor proteins**

352 Detection of quantitative tyrosine sulphation using real-time microfluidics represents a totally new  
353 approach to study this covalent modification *in vitro*. In order to unambiguously confirm sulphation

354 by TPST1 and TPST2 using a complementary technique, we used immunoblotting with a monoclonal  
355 antibody that specifically recognises sulphated tyrosine in intact proteins. Initially, we generated a  
356 recombinant protein consisting of Glutathione S-transferase (GST) fused to the CC4-tide sequence  
357 (EDFEDYEFDG) that was developed for TPST1 and TPST2 mobility-based enzyme assays (Figures  
358 2 and 3). As detailed in Figure 4A, this GST fusion protein became sulphated on tyrosine only after  
359 incubation with TPSTs, and this modification required PAPS in the assay. Consistently, GST was not  
360 detectably sulphated under any condition, confirming that the CC4-tide sequence was the target of  
361 both enzymes. Site specificity in the assay was confirmed by mutation of Tyr to Phe in the GST  
362 fusion protein, which abolished detection by the sulphotyrosine antibody. As a further control, we  
363 demonstrated that GST-CC4-tide could become Tyr phosphorylated, but not Tyr sulphated, after  
364 incubation with Ephrin A3 and Mg-ATP at the same tyrosine sulphated by TPST1/2 in GST-CC4-  
365 tide, (Figure 4C, note detection of pTyr in EphA3 protein due to autophosphorylation). This  
366 experiment also demonstrates unequivocally that the modification-specific antibodies can differentiate  
367 between sulphated and phosphorylated forms of the GST-CC4-tide protein. We also confirmed that  
368 full-length recombinant FGF7 was specifically modified by TPST1, but not TPST2 *in vitro*, consistent  
369 with side-by-side kinetic analysis of TPST1 and TPST2 FGF7-tide sulphation (compare Figures 2D  
370 and 4D).

### 371 **Analysis of TPST inhibition by biochemical and the protein kinase inhibitor rottlerin**

372 The ability of fluorescent peptide substrates to report TPST1 and TPST2-directed tyrosine sulphation  
373 in a plate-based assay format allowed us to develop an enzyme screen for the analysis and discovery  
374 of small molecule TPST inhibitors. Based upon the relative ease of purification and highly stable  
375 activity towards multiple substrates, we focused our biochemical screening studies on TPST1. As  
376 detailed in Figure 5A, the TPST ligands PAP, CoA, dephospho-CoA and ATP were all able to inhibit  
377 PAPS-dependent sulphation of fluorescent CC4-tide by TPST1 *in vitro*. The  $IC_{50}$  values for inhibition  
378 ranged from low to high  $\mu$ M. This finding is consistent with the ability of PAP ( $\Delta T_m = \sim 10$  °C) and  
379 CoA ( $\Delta T_m = \sim 11$  °C), the two most potent inhibitors in the enzyme assay, to interact and stabilise  
380 TPST1 (and TPST2) in thermal shift assays. Interestingly, the ability of PAP ( $IC_{50} = 1.5$   $\mu$ M) and  
381 CoA ( $IC_{50} = 87$   $\mu$ M) to inhibit TPST1 sulphation activity was highly sensitive to the concentration of  
382 PAPS in the assay, with peptide sulphation in the assay increasing (less inhibition) as a function of  
383 increasing PAPS, even taking into account the increases in enzyme activity induced by high levels of  
384 PAPS (Figure 5B, C). In contrast, weak TPST1 inhibition by ATP and dephospho-CoA was largely  
385 insensitive to increases in PAPS levels in the assay, suggesting that it was likely to represent weak or  
386 non-competitive enzyme binding (Figure 5D, E).

387 Several literature reports suggest that TPST1/2 are inhibited by nucleotide and non-nucleotide  
388 compounds *in vitro* [40, 58, 59]. Using quantitative TPST1 and 2 enzyme assays, we identified that

389 the broad-spectrum kinase inhibitor rottlerin, which was originally described as a ‘specific’ cellular  
390 PKC inhibitor [60], but later revealed to be a non-specific protein kinase inhibitor [61], inhibited  
391 PAPS-dependent TPST1 and TPST2 with single-digit micromolar IC<sub>50</sub> values (Figure 6A). We also  
392 evaluated the clinical orphan compound suramin [62] and the DNA polymerase inhibitor  
393 aurintricarboxylic acid [63] as TPST inhibitors (Figure 6C), demonstrating inhibition with low  
394 micromolar IC<sub>50</sub> values, validating recent independent findings [40]. Consistently, we confirmed that  
395 rottlerin binding also induced a positive TPST1 and TPST2 thermal shift (Figure 6B), although the  
396 degree of stabilisation relative to ATP was lower than predicted, given the potent inhibitory effect of  
397 rottlerin on TPST1 and TPST2 enzyme activity *in vitro*.

### 398 **Multiple RAF kinase inhibitors target TPST catalytic activity *in vitro***

399 The provocative chemical and structural similarities between CoA, PAP, ATP and PAPS (Figure 1A),  
400 combined with the inhibitory effects of rottlerin on TPST1 and 2, raised questions about the general  
401 sensitivity of TPST enzymes to ATP-competitive kinase inhibitors. These findings prompted us to  
402 screen the open access Published Kinase Inhibitor Set (PKIS), a collection of high-quality class-  
403 annotated kinase inhibitors assembled as a starting point to discover new chemical probes for enzyme  
404 targets. The commonality of the nucleotide-binding site in huge numbers of human proteins, and  
405 shared PAPS co-factor specificity in sulphotransferases made PKIS an attractive, unbiased, resource  
406 for identifying potential new inhibitors for this family of enzymes. We took a dual-pronged approach  
407 for ligand screening, employing firstly a rapid TPST1 DSF assay and secondly a TPST1 enzyme  
408 assay. For DSF, 20 µM compound was employed for screening with 1 mM ATP as positive control,  
409 and we used a reproducible cut off value of  $\sim\Delta T_m \pm 0.5^\circ\text{C}$  in order to define a ‘hit’ (Figure 7A). The  
410 top compound found through this approach was GW406108X, and we noted strong thermal shifts in  
411 TPST1 by several compounds belonging to this indole-based kinase inhibitor class (red, Figure 7A  
412 and Supplementary Figure 4). Each ‘hit’ compound was next re-screened in a TPST1 enzyme  
413 sulphation assay at 40 µM, and the activity remaining compared to DMSO control (Figure 7B).  
414 Consistent with our DSF assay, five of the top seven TPST1 inhibitors were previously known RAF  
415 inhibitors with IC<sub>50</sub> values for TPST1 in the low µM range, approximately an order of magnitude less  
416 potent than that of rottlerin (compare Figures 6C and 7C). These compounds were from two distinct  
417 types of previously described RAF inhibitors: derivatives of indole [64] or aza-stilbene [65] chemical  
418 classes. We investigated the rank order of potency for various indole compounds using GST-CC4-tide  
419 tyrosine sulphation, which was compared with rottlerin and PAP using the sulphotryosine-specific  
420 antibody (Figure 7D). Some limited Structure Activity Relationships (SARs) emerged from these  
421 initial screens, prompting us to evaluate whether our data permitted us to predict generalised TPST  
422 inhibition by other RAF inhibitors, including clinically-approved [66] and probe [67] compounds  
423 (Supplementary Figure 4). As shown in Figure 8A, duplicate assays revealed potent inhibition at a

424 high (400  $\mu$ M) concentration by many, but not all, RAF inhibitors tested, with dabrafenib, RAF-65,  
425 ZM336372, sorafenib and vemurafenib showing essentially complete TPST1 inhibition at this  
426 concentration. Titration of each compound confirmed a complex profile of inhibition, with some  
427 RAF inhibitors (e.g. vemurafenib) potentially inducing partial TPST-1 activation at lower  
428 concentrations, and then inhibiting activity at higher concentrations (Figure 8B), perhaps consistent  
429 with their complex mode of interaction with RAF, which includes promotion of dimerization and  
430 activation [68, 69]. The most compelling inhibitory data was obtained with RAF265, a phase I  
431 imidazo-benzimidazole RAF inhibitor [70, 71], for which an  $IC_{50}$  value of 6.5  $\mu$ M towards TPST1  
432 was measured, some 10-fold higher than that of rottlerin (Figure 8B). As shown in Figure 8C, both  
433 compounds exhibited dose-dependent inhibition when assayed in the presence of TPST1 and PAPS  
434 using GST-CC4-tide, and inhibition by RAF265 could be competitively decreased by increasing the  
435 concentration of PAPS in the assay, suggesting a partially competitive mode of inhibition with PAPS  
436 (Figure 8D, E).

#### 437 **Docking analysis of TPST ligands**

438 In order to model the interaction of hit and control TPST1/2 ligands, including rottlerin, suramin, the  
439 sorafenib-derivative RAF265, and GW305074X with TPST1, we employed molecular docking to  
440 evaluate potential binding modes of compounds using the crystal structure of TPST1 (PDB ID:  
441 5WRI). As shown in Figure 9A, like TPST2 [29], TPST1 possesses two adjacent docking sites in the  
442 extended catalytic region that accommodate binding of substrates, placing the tyrosine-containing  
443 substrate (left site) in proximity to the sulphate group of PAPS (right site). A docking protocol for the  
444 sulphation end-product PAP (adenosine-3'-5'-diphosphate) was developed that almost perfectly  
445 matched the crystallographic binding pose of this ligand for TPST1 (RMSD 0.30 Å, Figure 9B). By  
446 comparing experimentally-favoured configurations with those of the crystallised ligands (PAP and a  
447 CC4 peptide poised for sulphation), we were able to confidently dock rottlerin, suramin, RAF265 and  
448 GW305074X into the TPST1 active site. These compounds are predicted to make a number of  
449 stabilising interactions that help explain their ability to act as inhibitors of TPSTs *in vitro* (Figure 9C-  
450 F). For example, rottlerin (C) and GW305074X (D) are predicted to occupy the peptide-binding site  
451 of TPST1, whilst suramin (E) and RAF265 (F) span both the peptide and PAPS-binding sites,  
452 consistent with the competitive loss of TPST1 inhibition by RAF265 observed as the concentration of  
453 PAPS increases in enzyme assays (Figure 8D). In contrast, suramin is predicted to form a hydrogen  
454 bond with Ser286, whilst RAF-265 forms hydrogen bonds with both Ser286 and Leu84.

455

456 **DISCUSSION:**

457 TPSTs catalyze protein sulphation using PAPS as the sulphate group donor, and are thought to  
458 possess structural [29] and biochemical similarities with protein tyrosine kinases relevant to both  
459 binding of synthetic substrates and an ability to modify them enzymatically *in vitro* [72]. Overlapping  
460 sulphate or phosphate modifications can potentially occur on the same tyrosine residue when  
461 appropriate acidic residues dock the substrate into the active site for covalent modification [26, 73].  
462 Although the physiological relevance of combinatorial and competitive tyrosine modification on  
463 phosphate or sulphate (or nitrate) remains essentially unknown, bioinformatics analysis incorporating  
464 secondary structural analysis predicts that >20,000 context-dependent protein tyrosine residues are  
465 sulphated in the human proteome [30, 31, 74]. However, due to a lack of chemical tool compounds,  
466 sulphation is understudied in living organisms, often relying on ‘sledgehammer’ approaches  
467 employing non-specific reagents such as chorate or total genetic ablation [33]. The analysis of  
468 tyrosine sulphation remains ripe for both technological innovation and the discovery of new classes of  
469 sulphotransferase inhibitor [75] to promote chemical biology approaches in the field.

470 **DSF and sulphotransfer analysis of TPST1 and TPST2**

471 In this paper, we report a simple and rapid method for the detection of TPST-catalysed peptide  
472 sulphation using model substrates fused to an N-terminal fluorophore. The chemical similarity  
473 between the phosphate donor ATP and PAPS, the universal sulphate donor, led us to investigate  
474 whether peptide tyrosyl sulphation could be detected using a high-throughput enzymatic procedure  
475 previously validated for phosphorylation catalysed by ATP-dependent kinases. To isolate pure,  
476 enzymatically active recombinant TPST1 and TPST2, both were expressed at high levels in bacteria,  
477 and refolded after purification from inclusion bodies using published ‘slow’ procedures suitable for  
478 structural and enzymatic analysis of TPST1 [24] and TPST2 [29]. The affinity of our TPST1 and  
479 TPST2 preparations for the PAPS co-factor was found to be almost identical to that previously  
480 reported, and we confirmed that TPST1 and TPST2 were folded and could bind to a variety of  
481 physiological and non-physiological ligands. These included sulphated PAPS and PAP, the end  
482 product of the sulphotransferase reaction (Figure 1 and Supplementary Figure 1). Protein kinases are  
483 also known bind to the reaction end product of the phosphotransferase reaction (ADP), which can act  
484 as a weak ATP-competitive inhibitor [53]. Our study also revealed that TPST1 and 2 interact with the  
485 3'-phospho-adenosine moiety of the ligand Coenzyme A (CoA), confirming the availability of the 3'-  
486 phospho-adenosine docking region in the active site of TPSTs for unrelated ligand binding. To our  
487 knowledge, our studies are the first to employ DSF-based thermal shift assays to analyse TPST ligand  
488 binding, although these approaches are also widely used for semi-quantitative ligand binding analysis  
489 of growth factors [44, 76], protein kinase [53-56] and pseudokinase [77] domains, BH3 domains [78]  
490 and bromodomains [79].



491 We confirmed by DSF that TPST ligands act as competitive active-site inhibitors of peptide  
492 sulphation, creating a new impetus to develop novel screening approaches to discover TPST  
493 inhibitors. Standard biochemical assays often involve the detection of <sup>35</sup>S-based substrate sulphation  
494 derived from <sup>35</sup>S-labelled PAPS, and require enzymatic co-factor synthesis and time-consuming  
495 radioactive solid-phase chromatography (typically HPLC) procedures [80, 81]. In contrast, our  
496 peptide sulphation assay detects modification in real-time using a simple mobility shift assay, which is  
497 quantified by comparing the ratio of the sulphated and non-sulphated fluorescent substrates. This  
498 assay employs the EZ-Reader II platform originally developed for the rapid analysis of peptide  
499 phosphorylation, acetylation or proteolysis [48] and permits the inclusion of high concentrations of  
500 non-radioactive co-factors, substrates and ligands. The coupling of a fluorophore at the peptide N-  
501 terminus, distinct from the site of tyrosine sulphation (Figure 1B) overcomes current limitations with  
502 fluorescent TPST substrates, in which the fluorophore lies adjacent to the site of sulphation. In the  
503 course of our studies, we established a high reproducibility for this assay, and exploited it to probe  
504 substrate specificity and discover new enzyme inhibitors. We also generated a substrate lacking a key  
505 Tyr residue, a dual protein kinase/TPST substrate and model TPST substrates containing acidic  
506 residues at the -1 and +1 position relative to the sulphated Tyr. These allowed us to generate CCR8  
507 and FGF7 substrates for TPST1, which were not substrates for TPST2, and dual substrates with  
508 differential (CC4-tide) or very similar (PSGL1) sulphation kinetics for TPST1 and TPST2. Based on  
509 our initial analyses, we found that TPST2 only sulphated tyrosine-containing peptide substrates with  
510 an acidic residue in both the +1 and -1 position, whereas TPST1 dependent tyrosine sulphation only  
511 required a negative charge to be present in the -1 site (Figure 2). Future work will employ a much  
512 larger selection of peptide substrates to evaluate this preference further, with a goal of defining  
513 TPST1 and TPST2 substrate specificity *in vitro* that can be exploited to help examine the  
514 sulphoproteomic datasets emerging from cell-based studies.

#### 515 **New small molecule TPST1 inhibitors**

516 Our finding that TPST1 was inhibited at sub-micromolar concentrations by the anti-angiogenic  
517 compound suramin, which has been used clinically to treat River Blindness and African  
518 trypanosomiasis [62], and the cellular DNA polymerase inhibitor aurintricarboxylic acid [63] were  
519 intriguing, and consistent with a very recent report demonstrating inhibitory activity towards TPSTs  
520 [40]. By screening a panel of kinase inhibitors, we found that rottlerin (also known as mallotoxin) is  
521 also a low micromolar inhibitor of TPST1 and TPST2 *in vitro*. Rottlerin was originally identified as  
522 an inhibitor of PKC isozymes [60], but can also act as a sub-micromolar inhibitor of other protein  
523 kinases *in vitro* [61]. Interestingly, we discovered that all three of these compounds also have  
524 inhibitory activity towards the related PAPS-dependent oligosaccharide sulphotransferase HS2ST *in*  
525 *vitro* [Byrne et al., submitted alongside this manuscript], allowing us to infer that structural  
526 similarities in the PAPS or substrate-binding regions of HS2ST and TPST1/2 present a binding

527 surface that accommodates small polyanionic compounds, which like TPST acidic peptide substrates,  
528 presumably bind through electrostatic interactions in the enzyme active site. These findings  
529 heightened the possibility that other kinase inhibitors might also be serendipitous TPST inhibitors.

530 To evaluate this hypothesis, we identified a number of TPST1 ligands in PKIS. Intriguingly, 4 of the  
531 top 7 hits in this screen belonged to the same benzylidene-1H-inol-2-one (oxindole) c-RAF kinase  
532 inhibitor sub-class [64]. Moreover, of the other top 30 TPST inhibitors identified (TPST1 enzyme  
533 inhibition >40% at 20  $\mu$ M), GW445015X, GW445017X, and most notably, GW458344A, were all  
534 potent c-RAF inhibitors, belonging to the chemically distinct aza-stilbene chemical class [65]. We  
535 next confirmed that distinct RAF inhibitors also possess inhibitory properties towards TPST1.  
536 Interestingly, well-validated clinical RAF inhibitors, including RAF265 (IC<sub>50</sub> 6.5  $\mu$ M), vemurafenib  
537 (IC<sub>50</sub> ~40  $\mu$ M) and the much higher micromolar TPST inhibitor sorafenib (which contains the same 2-  
538 arylaminobenzimidazole chemical scaffold found in RAF265, Supplementary Figure 7), were also  
539 TPST1 inhibitors *in vitro*. These findings demonstrate that many compounds designed as RAF  
540 inhibitors also have the ability to inhibit TPST1, providing a new impetus to exploit the huge amount  
541 of RAF inhibitor design knowledge available in private and public databases for the design and testing  
542 of TPST inhibitors. In a related paper, we demonstrated cross-reactivity of rottlerin and oxindole-  
543 based (but not aza-stilbene or other RAF inhibitors) with the glycan sulphotransferases HS2ST [Byrne  
544 et al., submitted alongside this manuscript]. Interestingly, the potency of HS2ST inhibition by  
545 oxindole-based c-RAF inhibitors was some 10-fold higher than that for TPST1, and we confirmed that  
546 TPST RAF inhibitors such as RAF265 and aza-stilbenes did not inhibit HS2ST at any concentration  
547 tested. These subtle differences suggest that although inhibitor sensitivity to this class of RAF  
548 inhibitor can be shared between two distinct classes of sulphotransferase, opportunities exist for the  
549 development of both specific and potent ligands targeted more specifically towards either HS2ST or  
550 TPSTs.

## 551 **CONCLUSIONS:**

552 In order to stimulate progress in implementing chemical biology in the sulphotransferase field, careful  
553 structure-based comparison between HS2ST, TPST1/2 and RAF kinases inhibition, and analysis of a  
554 wide variety of compound chemotypes, will be required. Our docking studies with TPST1 suggest  
555 similar binding modes for both rottlerin and the potent oxindole TPST1 inhibitor GW305074X  
556 (Figure 5), whilst suramin and RAF265 feasibly interact with the extended peptide and PAPS cofactor  
557 binding sites. It will be intriguing to confirm these binding modes through structural analysis and  
558 guided enzyme mutagenesis, and to identify drug-binding site residues in sulphotransferases that  
559 dictate inhibition. This information can then be used for careful compound analysis and the generation  
560 of drug-resistant alleles for cellular analysis, using concepts developed for compound target validation  
561 in the kinase field [82-86]. In the first instance, it will also be important to evaluate whether any of the

562 TPST ligands identified here, particularly cellular RAF inhibitors, interfere with protein tyrosine  
563 sulphation in cells, since it remains formally possible that some of the cellular phenotypes and/or  
564 clinical effects documented with these compound classes [66], might be explained in part by “off-  
565 target” effects on sulphation-based biology.

566 Our work also raises the possibility that TPST inhibitors might be synthesised or repurposed based  
567 upon workflows previously developed for the iteration of the different families of (RAF) kinase  
568 inhibitors. Although only two TPSTs are present in multicellular eukaryotes, the development of  
569 specific inhibitors might be challenging, given the ~90% similarity within the active site, and the  
570 presence of multiple distinct PAPS-dependent sulphotransferases in vertebrate genomes. However, in  
571 this context it is useful to recall the rapid development of the kinase inhibitor field as an exemplar.  
572 Initial scepticism about the feasibility (or even, the need) to generate specific inhibitors of protein  
573 kinases has been largely overcome [87], partly through innovative synthetic approaches, but also by a  
574 deep understanding of mechanistic and structural kinase biology available within the >500 distinct  
575 members of the human kinome [35]. An appreciation that compound polypharmacology, perhaps  
576 across multiple enzyme classes, is important for driving, and predicting, both efficacy and compound  
577 side-effects for kinase inhibitors [88-90] might also be useful for the development of TPST inhibitors.

578 Finally, inhibitor-based interrogation of TPST-dependent tyrosine sulphation could be employed  
579 alongside MS-based sulphoproteomics [32, 91]. This could have significant impact in various areas of  
580 research by increasing our ability to chemically control and modulate tyrosine sulphation and even  
581 manipulate sulphation of specific proteins, including those implicated in, for example, infection and  
582 inflammation. Given the close parallels between tyrosine sulphation and tyrosine phosphorylation,  
583 whose rational targeting rapidly led to the clinical analysis of dozens of small molecule inhibitors  
584 [87], we suggest that a new opportunity might also soon exist to integrate the analysis of TPST with  
585 the tools of chemical biology.

586

587 **ACKNOWLEDGEMENTS:**

588 This work was funded by a BBSRC Tools and Resources Development Grant (BB/N021703/1) and a  
589 Royal Society Research Grant (to PAE), a European Commission FET-OPEN grant (ArrestAD  
590 no.737390) to DGF, PAE and DPG, North West Cancer Research (NWCR) grants CR1088 and  
591 CR1097 and a NWCR endowment (to DGF). The SGC is a registered charity (number 1097737) that  
592 receives funds from AbbVie, Bayer Pharma AG, Boehringer Ingelheim, Canada Foundation for  
593 Innovation, Eshelman Institute for Innovation, Genome Canada, Innovative Medicines Initiative  
594 (EU/EFPIA) [ULTRA-DD grant no. 115766], Janssen, Merck KGaA Darmstadt Germany, MSD,  
595 Novartis Pharma AG, Ontario Ministry of Economic Development and Innovation, Pfizer, São Paulo  
596 Research Foundation-FAPESP, Takeda, and The Wellcome Trust [106169/ZZ14/Z]

597

598 **AUTHOR CONTRIBUTIONS:**

599 PAE obtained BBSRC grant funding with DGF. PAE, DGF, DPB, YL, PN, KR, CEE and NGB  
600 designed and executed the experiments. CW, DHD and WJZ provided compound libraries, protocols  
601 and advice. PAE wrote the paper with contributions and final approval from all of the co-authors.

602

603

604

605

606

607

608

609

610

611

612

613 **FIGURE LEGENDS:**

614 **Figure 1. Analysis of purified recombinant 6His-TPST proteins.** (A) Biochemical structure of  
615 PAPS and PAPS-related compounds. (B) Coomassie blue staining of purified recombinant 6His-  
616 TPST enzymes: 1  $\mu\text{g}$  of TPST1 and 2 were analysed by SDS-PAGE after purification to near  
617 homogeneity. (C) TSA, and calculation of  $T_m$ , for TPST1 (5  $\mu\text{M}$ ) in the presence of 0.5 mM PAPS  
618 (red) or 0.5 mM APS (blue); buffer control is in black. (D)  $\Delta T_m$  for TPST1 in the presence of PAPS  
619 and APS, as measured by DSF, data derived from (C).  $\Delta T_m$  values were calculated by subtracting the  
620 control  $T_m$  value (buffer, no nucleotide) from the measured  $T_m$  value. (E) As for (C) but using TPST2.  
621 (F) As for (D), but employing TPST2. (G) Analysis of PAPS-dependent thermal stabilization of  
622 TPST1 and TPST2. TSA employing TPST1 or TPST2 proteins (5  $\mu\text{M}$ ) were measured in the presence  
623 of the indicated concentration of PAPS.  $\Delta T_m$  values were calculated by DSF, as described above.

624 **Figure 2. Detection of tyrosylprotein sulphotransferase activity using a direct microfluidic**  
625 **mobility shift assay and fluorescent peptide substrates.**

626 (A) Schematic representation of PAPS-dependent sulphate incorporation into a tyrosine residue of a  
627 substrate. The sequence of the synthetic single Tyr-containing peptide (CC4-tide, containing a  
628 fluorescent 5-FAM group at the N-terminus) is shown above the native human CC4 protein sequence.  
629 (B) TPST1 and TPST2-dependent tyrosine sulphation alters the microfluidic mobility of CC4-tide.  
630 Separation of the higher-mobility, sulphated (product, P) peptide from the lower-mobility (substrate,  
631 S) peptide occurs through a difference in their net charge. (C-F) Time-dependent tyrosine sulphation  
632 of CC4-tide (C) or fluorescently-labelled tyrosine-containing substrate peptides derived from human  
633 FGF7 (D), CCR4 (E) or PSGL1 (F) proteins. Direct peptide sulphation was calculated by measuring  
634 the ratio of substrate peptide to sulpho-peptide at the indicated time points after adding the PAPS co-  
635 factor. All assays were performed at room temperature (20  $^{\circ}\text{C}$ ) using 2  $\mu\text{M}$  final concentration of the  
636 appropriate fluorescent peptide substrate, 500  $\mu\text{M}$  PAPS and 0.4  $\mu\text{M}$  TPST1 or TPST2.

637

638 **Figure 3. Changes in fluorescent peptide mobility are a consequence of TPST-catalysed tyrosine**  
639 **sulphation.**

640 Mobility-analysis of TPST1-dependent peptide sulphation for (A) CC4-tide or (B) CC4-tide in which  
641 the Tyr acceptor site is mutated to Phe (Tyr741Phe). Recombinant TPST1 enzyme (0.4  $\mu\text{M}$ ) was  
642 assayed using 2  $\mu\text{M}$  peptide substrate  $\pm$  10  $\mu\text{M}$  PAPS as sulphate donor. (C) Dual detection of  
643 tyrosine phosphorylation or tyrosine sulphation of CC4-tide. TPST1 (0.2  $\mu\text{M}$ ) or EphA3 tyrosine  
644 kinase (0.3  $\mu\text{M}$ ) were incubated with 2  $\mu\text{M}$  CC4-tide in the presence of 500  $\mu\text{M}$  PAPS (sulphate  
645 donor) or 500  $\mu\text{M}$  ATP (phosphate donor). (D) Lack of tyrosine sulphation of a distinct tyrosine-  
646 containing EphA3 substrate peptide by TPST1 or 2. Assay conditions were as for (C).

647

648

649 **Figure 4. Validation of *in vitro* recombinant TPST sulphotransferase activity.**

650 Immunoblot of an *in vitro* sulphotransferase assay using a recombinant GST-tagged CC4-tide.  
651 Recombinant, purified GST-CC4-tide or purified GST alone (1  $\mu$ g) were incubated at room  
652 temperature for 1 h with 1  $\mu$ g TPST1 or TPST2  $\pm$  500  $\mu$ M PAPS (sulphate donor) or 500  $\mu$ M ATP  
653 (phosphate donor). **(B)** Immunoblot demonstrating TPST1 and TPST2-dependent sulphation of GST-  
654 CC4-tide at the specific tyrosine residue sulphated in intact CC4 (Tyr741). Assay was performed with  
655 1  $\mu$ g of each TPST enzyme, GST-CC4tide or GST-CC4-tide (Tyr741Phe) and 500  $\mu$ M PAPS for 1 h  
656 at room temperature. **(C)** Western blot confirming that monoclonal sulphotyrosine antibody does not  
657 cross react with phosphotyrosine. 1  $\mu$ g GST-CC4-tide and GST was incubated for 1 h with 2  $\mu$ g  
658 TPST1 or EphA3  $\pm$  500  $\mu$ M PAPS or 500  $\mu$ M ATP. GST CC4-tide sulphation (top panel), EphA3  
659 autophosphorylation or GST-CC4-tide phosphorylation (middle panel) are indicated. **(D)** Detection of  
660 recombinant FGF7 *in vitro* sulphation by immunoblot. Halo-tagged FGF7 (5  $\mu$ g) was incubated for 16  
661 h at 20°C with 2  $\mu$ g TPST protein  $\pm$  500  $\mu$ M PAPS 500  $\mu$ M ATP and tyrosine sulphation was detected  
662 using a monoclonal sulphotyrosine antibody (top panel). For all assays, equal loading of substrate  
663 proteins was confirmed by Ponceau S staining (bottom panels).

664

665 **Figure 5. Nucleotide-dependent inhibition of TPST1 sulphotransferase activity varies with**  
666 **PAPS.**

667 **(A)** Dose response curves and IC<sub>50</sub> values for a panel of nucleotides incubated with TPST1 in the  
668 presence of 10  $\mu$ M PAPS co-factor. TPST1 activity was measured using CC4-tide and normalized to  
669 controls containing buffer alone. **(B-E)** TPST1-dependent CC4-tide sulphation was measured in the  
670 presence of increasing PAPS concentration and a fixed concentration of **(B)** 20  $\mu$ M PAP, **(C)** 100  $\mu$ M  
671 ATP, **(D)** 100  $\mu$ M CoA or **(E)** 100  $\mu$ M dephospho-CoA. All assays were performed using 0.1  $\mu$ M  
672 TPST1 in the absence of MgCl<sub>2</sub>.

673

674 **Figure 6. Targeting TPST sulphotransferase activity with small molecule inhibitors.**

675 **(A)** Dose response curves and calculated TPST IC<sub>50</sub> values for rottlerin. TPST1 and 2 were incubated  
676 with the indicated concentration of rottlerin in the presence of 10  $\mu$ M PAPS. TPST sulphotransferase  
677 activity towards CC4-tide was normalized to control reactions containing 1% (v/v) DMSO. **(B)**  
678 Thermal stability of purified TPST1 or TPST2 (5  $\mu$ M) was measured in the presence of 10  $\mu$ M  
679 rottlerin or 500  $\mu$ M ATP as control.  $\Delta$ T<sub>m</sub> values were calculated by DSF as previously described. **(C)**  
680 TPST1 IC<sub>50</sub> values for the previously described compounds suramin, aurintricarboxylic acid and  
681 rottlerin were calculated using TPST1 and CC4-tide in the presence of 10  $\mu$ M PAPS, and activity was  
682 normalized to control reactions containing 1% (v/v) DMSO

683

684

685

686 **Figure 7. Mining the PKIS inhibitor library for TPST1 inhibitors.**

687 (A) Identification of PKIS small molecule ligands that alter TPST1 thermal stability. TPST1 (5  $\mu$ M)  
688 was screened using PKIS compounds at final concentration of 20  $\mu$ M compound and 4 % (v/v)  
689 DMSO.  $\Delta T_m$  values were calculated by subtracting the control  $T_m$  value (DMSO alone, no inhibitor)  
690 from  $T_m$  values. Data shown is a scatter plot of the mean  $\Delta T_m$  values from two independent DSF-  
691 based assays. (B) Enzymatic inhibition of TPST1 sulphotransferase activity by selected PKIS  
692 compounds. TPST1 (0.1  $\mu$ M) was incubated with the appropriate PKIS compound (40  $\mu$ M) in the  
693 presence of 10  $\mu$ M PAPS for 30 mins at 37°C. TPST1 activity was measured using CC4-tide and  
694 normalised to 4% (v/v) DMSO control. The chemical class of inhibitor identified is colour coded. (C)  
695 Compound dose-response and estimation of  $IC_{50}$  values for selected chemical classes of PKIS  
696 inhibitors. TPST1 (0.1  $\mu$ M) was incubated with increasing concentrations of the indicated inhibitor in  
697 the presence of 10  $\mu$ M PAPS for 30 mins at 37 °C. TPST1 activity was measured using CC4-tide and  
698 normalised to DMSO controls.  $IC_{50}$  values were calculated from a single experiment, although similar  
699 results were seen in an independent experiment. (D) Immunoblots evaluating time-dependence of  
700 TPST1 sulphotransferase activity in the presence of a panel of PKIS or control inhibitors. 1  $\mu$ g GST-  
701 CC4-tide was incubated for the appropriate time in the presence of 0.2  $\mu$ g TPST1, 10  $\mu$ M PAPS and a  
702 fixed concentration (40  $\mu$ M) of the indicated inhibitor. After reaction termination, tyrosine sulphation  
703 was subsequently visualized using monoclonal sulphotyrosine antibody (top panel), with equal GST-  
704 CC4-tide loading confirmed by Ponceau S staining (bottom panel). GST-CC4 sulphation was  
705 performed for either 15 minutes (top panels) or 40 minutes (bottom panels).

706

707 **Figure 8. Evaluation of TPST1 inhibition by a panel of RAF kinase inhibitors.**

708 (A) Inhibition of TPST1 by RAF265 and other classes of RAF inhibitor. TPST1 (0.1  $\mu$ M) was pre-  
709 incubated with the appropriate inhibitor (400  $\mu$ M) and the assay was initiated with PAPS (10  $\mu$ M). (B)  
710 Dose response and estimated  $IC_{50}$  values for TPST1 inhibition by RAF kinase inhibitors. TPST1 (0.1  
711  $\mu$ M) was pre-incubated with the indicated concentration of compound, and the assay initiated with  
712 PAPS (10  $\mu$ M). (C) Immunoblotting of GST-CC4-tide (1  $\mu$ g) sulphation by TPST1 (1  $\mu$ g) in the  
713 presence of increasing concentrations of RAF265 or Rottlerin. TPST1 was pre-incubated with the  
714 indicated concentration of inhibitor, and assays performed in the presence or 10  $\mu$ M PAPS for 15  
715 mins at 20°C. (D) Antibody-based quantification of GST-CC4-tide sulphation by TPST1 in the  
716 presence of RAF-265 as a function of PAPS concentration. The tyrosine sulphation of GST-CC4-tide  
717 (a measure of TPST1 activity) was quantified by densitometry with IMAGE J software. Data were  
718 normalized to sulphation in the presence of 500  $\mu$ M PAPS and 4% (v/v) DMSO, which represents  
719 100% activity in the absence of the inhibitor. (E) A representative immunoblot corresponding to the  
720 data quantified in (D) is presented.

721

722

723 **Figure 9. Molecular docking analysis of TPST1 with small molecule inhibitor compounds.**

724 (A) Structure of human TPST1 complexed with adenosine-3'-5'-diphosphate (PAP) and the human  
725 CC4-derived substrate EDFEDYEFDPDB ID: 5WRI (Protein rendered in grey cartoon). The  
726 inhibitory co-factor PAP (which replaces the physiological co-factor PAPS) and the co-crystallised  
727 CC4 substrate peptide are rendered as coloured sticks. Atoms are coloured grey (carbon), red  
728 (oxygen) blue (nitrogen) or cyan (oxygen of crystallographic water). Black dotted line indicates the  
729 close proximity of the tyrosyl hydroxyl group and PAP. (B) TPST1 docking poses compared.  
730 Experimentally-derived (PDB ID: 5WRI) crystallographic carbons (cyan) or our modelled docking  
731 carbons (purple) are overlaid for the inhibitory co-factor mimic PAP. TPST1 was rendered as a  
732 cartoon. PAP shown in coloured sticks. Black dotted lines indicate hydrogen bonds. Rottlerin (C),  
733 GW305074X, (D) suramin (E) or RAF265 (E) were all docked into human TPST1 (PDB ID: 5WRI),  
734 although docking solutions for each inhibitor could also be made with the very similar by employing  
735 the TPST2 catalytic domain (PDB ID: 3AP1). Proteins are depicted as cartoons with the following  
736 features: red –  $\alpha$  helix, yellow –  $\beta$  sheet, green – loop. Docked molecules are coloured as sticks. Black  
737 dotted lines indicate potential hydrogen bonds.

738 **Supplementary Figure 1. DSF-based analysis of TPST1 and TPST2 ligand interactions.**

739 Thermal stability profiles of (A) TPST1 or (B) TPST2 were measured in the presence of the indicated  
740 nucleotide.  $\Delta T_m$  values were calculated relative to buffer controls for each TPST enzyme (5  $\mu$ M) in  
741 the presence of 0.5 mM of the indicated nucleotide  $\pm$  10 mM  $MgCl_2$ .

742 **Supplementary Figure 2.  $K_m$  [PAPS] determination for TPST1.**

743 Kinetic analysis of CC4-tide (2  $\mu$ M) sulphation by purified TPST1 (0.1  $\mu$ M) was performed in the  
744 presence of increasing concentrations of the sulphate donor PAPS. The  $K_m$  [PAPS] value ( $\pm$  standard  
745 deviation) was calculated by comparing the rate of peptide sulphation (pmoles sulphate/min) and  
746 linear regression software (GraphPad Prism) from four independent experiments.

747 **Supplementary Figure 3. Analysis of TPST1 and TPST2 activity in the presence of selected**  
748 **divalent metal cations.**

749 The extent of CC4-tide sulphation was measured as a function of  $Mg^{2+}$  or  $Mn^{2+}$  ion concentration.  
750 TPST1 or TPST2 (0.1  $\mu$ M) were incubated with increasing concentrations of  $Mg^{2+}$  or  $Mn^{2+}$  in the  
751 presence of 10  $\mu$ M PAPS. TPST1 activity was normalised to a buffer control.

752 **Supplementary Figure 4. Chemical structures of TPST ligands.**

753 The chemical structures of rottlerin, suramin and aurintricarboxylic acid, a panel of TPST inhibitors  
754 discovered from PKIS and various known RAF inhibitors.



755 **REFERENCES:**

- 756 1. Hunter, T., *Tyrosine phosphorylation: thirty years and counting*. Current opinion in cell  
757 biology, 2009. **21**(2): p. 140-6.
- 758 2. Moore, K.L., *The biology and enzymology of protein tyrosine O-sulfation*. The Journal of  
759 biological chemistry, 2003. **278**(27): p. 24243-6.
- 760 3. Gregory, H., et al., *The Antral Hormone Gastrin. Structure of Gastrin*. Nature, 1964. **204**: p.  
761 931-3.
- 762 4. Ippel, J.H., et al., *Structure of the tyrosine-sulfated C5a receptor N terminus in complex with*  
763 *chemotaxis inhibitory protein of Staphylococcus aureus*. The Journal of biological chemistry,  
764 2009. **284**(18): p. 12363-72.
- 765 5. Choe, H., et al., *Sulphated tyrosines mediate association of chemokines and Plasmodium*  
766 *vivax Duffy binding protein with the Duffy antigen/receptor for chemokines (DARC)*.  
767 Molecular microbiology, 2005. **55**(5): p. 1413-22.
- 768 6. Veldkamp, C.T., et al., *Structural basis of CXCR4 sulfotyrosine recognition by the chemokine*  
769 *SDF-1/CXCL12*. Science signaling, 2008. **1**(37): p. ra4.
- 770 7. Seibert, C., et al., *Sequential tyrosine sulfation of CXCR4 by tyrosylprotein sulfotransferases*.  
771 Biochemistry, 2008. **47**(43): p. 11251-62.
- 772 8. Huang, C.C., et al., *Structures of the CCR5 N terminus and of a tyrosine-sulfated antibody*  
773 *with HIV-1 gp120 and CD4*. Science, 2007. **317**(5846): p. 1930-4.
- 774 9. Leyte, A., et al., *Sulfation of Tyr1680 of human blood coagulation factor VIII is essential for*  
775 *the interaction of factor VIII with von Willebrand factor*. The Journal of biological chemistry,  
776 1991. **266**(2): p. 740-6.
- 777 10. Michnick, D.A., et al., *Identification of individual tyrosine sulfation sites within factor VIII*  
778 *required for optimal activity and efficient thrombin cleavage*. The Journal of biological  
779 chemistry, 1994. **269**(31): p. 20095-102.
- 780 11. Cormier, E.G., et al., *Specific interaction of CCR5 amino-terminal domain peptides*  
781 *containing sulfotyrosines with HIV-1 envelope glycoprotein gp120*. Proceedings of the  
782 National Academy of Sciences of the United States of America, 2000. **97**(11): p. 5762-7.
- 783 12. Farzan, M., et al., *Tyrosine sulfation of the amino terminus of CCR5 facilitates HIV-1 entry*.  
784 Cell, 1999. **96**(5): p. 667-76.
- 785 13. Hortin, G.L., et al., *Sulfation of tyrosine residues increases activity of the fourth component of*  
786 *complement*. Proceedings of the National Academy of Sciences of the United States of  
787 America, 1989. **86**(4): p. 1338-42.
- 788 14. Bundgaard, J.R., J. Vuust, and J.F. Rehfeld, *Tyrosine O-sulfation promotes proteolytic*  
789 *processing of progastrin*. The EMBO journal, 1995. **14**(13): p. 3073-9.
- 790 15. Pouyani, T. and B. Seed, *PSGL-1 recognition of P-selectin is controlled by a tyrosine*  
791 *sulfation consensus at the PSGL-1 amino terminus*. Cell, 1995. **83**(2): p. 333-43.
- 792 16. Bowman, K.G., et al., *Identification of an N-acetylglucosamine-6-O-sulfotransferase activity*  
793 *specific to lymphoid tissue: an enzyme with a possible role in lymphocyte homing*. Chemistry  
794 & biology, 1998. **5**(8): p. 447-60.
- 795 17. Niehrs, C. and W.B. Huttner, *Purification and characterization of tyrosylprotein*  
796 *sulfotransferase*. The EMBO journal, 1990. **9**(1): p. 35-42.
- 797 18. Niehrs, C., et al., *Analysis of the substrate specificity of tyrosylprotein sulfotransferase using*  
798 *synthetic peptides*. The Journal of biological chemistry, 1990. **265**(15): p. 8525-32.
- 799 19. Beisswanger, R., et al., *Existence of distinct tyrosylprotein sulfotransferase genes: molecular*  
800 *characterization of tyrosylprotein sulfotransferase-2*. Proceedings of the National Academy  
801 of Sciences of the United States of America, 1998. **95**(19): p. 11134-9.
- 802 20. Mishiro, E., et al., *Differential enzymatic characteristics and tissue-specific expression of*  
803 *human TPST-1 and TPST-2*. Journal of biochemistry, 2006. **140**(5): p. 731-7.
- 804 21. Ouyang, Y., W.S. Lane, and K.L. Moore, *Tyrosylprotein sulfotransferase: purification and*  
805 *molecular cloning of an enzyme that catalyzes tyrosine O-sulfation, a common*  
806 *posttranslational modification of eukaryotic proteins*. Proceedings of the National Academy  
807 of Sciences of the United States of America, 1998. **95**(6): p. 2896-901.

- 808 22. Ouyang, Y.B. and K.L. Moore, *Molecular cloning and expression of human and mouse*  
809 *tyrosylprotein sulfotransferase-2 and a tyrosylprotein sulfotransferase homologue in*  
810 *Caenorhabditis elegans*. The Journal of biological chemistry, 1998. **273**(38): p. 24770-4.
- 811 23. Hartmann-Fatu, C., et al., *Heterodimers of tyrosylprotein sulfotransferases suggest existence*  
812 *of a higher organization level of transferases in the membrane of the trans-Golgi apparatus*.  
813 *Journal of molecular biology*, 2015. **427**(6 Pt B): p. 1404-12.
- 814 24. Tanaka, S., et al., *Structural basis for the broad substrate specificity of the human*  
815 *tyrosylprotein sulfotransferase-1*. Scientific reports, 2017. **7**(1): p. 8776.
- 816 25. Lee, R.W. and W.B. Huttner, *(Glu62, Ala30, Tyr8)n serves as high-affinity substrate for*  
817 *tyrosylprotein sulfotransferase: a Golgi enzyme*. Proceedings of the National Academy of  
818 Sciences of the United States of America, 1985. **82**(18): p. 6143-7.
- 819 26. Braun, S., W.E. Raymond, and E. Racker, *Synthetic tyrosine polymers as substrates and*  
820 *inhibitors of tyrosine-specific protein kinases*. The Journal of biological chemistry, 1984.  
821 **259**(4): p. 2051-4.
- 822 27. Seibert, C., et al., *Tyrosine sulfation of CCR5 N-terminal peptide by tyrosylprotein*  
823 *sulfotransferases 1 and 2 follows a discrete pattern and temporal sequence*. Proceedings of  
824 the National Academy of Sciences of the United States of America, 2002. **99**(17): p. 11031-6.
- 825 28. Zhou, W., B.P. Duckworth, and R.J. Geraghty, *Fluorescent peptide sensors for tyrosylprotein*  
826 *sulfotransferase activity*. Analytical biochemistry, 2014. **461**: p. 1-6.
- 827 29. Teramoto, T., et al., *Crystal structure of human tyrosylprotein sulfotransferase-2 reveals the*  
828 *mechanism of protein tyrosine sulfation reaction*. Nature communications, 2013. **4**: p. 1572.
- 829 30. Monigatti, F., et al., *The Sulfinator: predicting tyrosine sulfation sites in protein sequences*.  
830 *Bioinformatics*, 2002. **18**(5): p. 769-70.
- 831 31. Huang, S.Y., et al., *PredSulSite: prediction of protein tyrosine sulfation sites with multiple*  
832 *features and analysis*. Analytical biochemistry, 2012. **428**(1): p. 16-23.
- 833 32. Chen, G., et al., *Distinguishing Sulfotyrosine Containing Peptides from their Phosphotyrosine*  
834 *Counterparts Using Mass Spectrometry*. Journal of the American Society for Mass  
835 Spectrometry, 2018. **29**(3): p. 455-462.
- 836 33. Baeuerle, P.A. and W.B. Huttner, *Chlorate--a potent inhibitor of protein sulfation in intact*  
837 *cells*. Biochemical and biophysical research communications, 1986. **141**(2): p. 870-7.
- 838 34. Hubbard, S.R., *Crystal structure of the activated insulin receptor tyrosine kinase in complex*  
839 *with peptide substrate and ATP analog*. The EMBO journal, 1997. **16**(18): p. 5572-81.
- 840 35. Manning, G., et al., *The protein kinase complement of the human genome*. Science, 2002.  
841 **298**(5600): p. 1912-34.
- 842 36. Cohen, P., *Protein kinases--the major drug targets of the twenty-first century?* Nature  
843 reviews. Drug discovery, 2002. **1**(4): p. 309-15.
- 844 37. Kehoe, J.W., et al., *Tyrosylprotein sulfotransferase inhibitors generated by combinatorial*  
845 *target-guided ligand assembly*. Bioorganic & medicinal chemistry letters, 2002. **12**(3): p. 329-  
846 32.
- 847 38. Danan, L.M., et al., *Mass spectrometric kinetic analysis of human tyrosylprotein*  
848 *sulfotransferase-1 and -2*. Journal of the American Society for Mass Spectrometry, 2008.  
849 **19**(10): p. 1459-66.
- 850 39. Danan, L.M., et al., *Catalytic mechanism of Golgi-resident human tyrosylprotein*  
851 *sulfotransferase-2: a mass spectrometry approach*. Journal of the American Society for Mass  
852 Spectrometry, 2010. **21**(9): p. 1633-42.
- 853 40. Zhou, W., et al., *A fluorescence-based high-throughput assay to identify inhibitors of*  
854 *tyrosylprotein sulfotransferase activity*. Biochemical and biophysical research  
855 communications, 2017. **482**(4): p. 1207-1212.
- 856 41. Vargas, F., M.D. Tuong, and J.C. Schwartz, *Inhibitors and dipeptide substrates for a*  
857 *microsomal tyrosylsulfotransferase from rat brain*. Journal of enzyme inhibition, 1986. **1**(2):  
858 p. 105-12.
- 859 42. Mohanty, S., et al., *Hydrophobic Core Variations Provide a Structural Framework for*  
860 *Tyrosine Kinase Evolution and Functional Specialization*. PLoS genetics, 2016. **12**(2): p.  
861 e1005885.

- 862 43. Seibert, C., et al., *Preparation and analysis of N-terminal chemokine receptor sulfopeptides*  
863 *using tyrosylprotein sulfotransferase enzymes*, in *Methods in enzymology* 2016, Elsevier. p.  
864 357-388.
- 865 44. Sun, C., et al., *HaloTag is an effective expression and solubilisation fusion partner for a*  
866 *range of fibroblast growth factors*. PeerJ, 2015. **3**: p. e1060.
- 867 45. McSkimming, D.I., et al., *KinView: a visual comparative sequence analysis tool for*  
868 *integrated kinome research*. Molecular bioSystems, 2016. **12**(12): p. 3651-3665.
- 869 46. Murphy, J.M., et al., *A robust methodology to subclassify pseudokinases based on their*  
870 *nucleotide-binding properties*. The Biochemical journal, 2014. **457**(2): p. 323-34.
- 871 47. Murphy, J.M., et al., *A robust methodology to subclassify pseudokinases based on their*  
872 *nucleotide-binding properties*. Biochemical Journal, 2014. **457**(2): p. 323-334.
- 873 48. Blackwell, L.J., et al., *High-throughput screening of the cyclic AMP-dependent protein kinase*  
874 *(PKA) using the caliper microfluidic platform*. Methods in molecular biology, 2009. **565**: p.  
875 225-37.
- 876 49. Elkins, J.M., et al., *Comprehensive characterization of the Published Kinase Inhibitor Set*.  
877 Nature biotechnology, 2016. **34**(1): p. 95-103.
- 878 50. Drewry, D.H., et al., *Progress towards a public chemogenomic set for protein kinases and a*  
879 *call for contributions*. PloS one, 2017. **12**(8): p. e0181585.
- 880 51. Jones, G., et al., *Development and validation of a genetic algorithm for flexible docking*.  
881 Journal of molecular biology, 1997. **267**(3): p. 727-48.
- 882 52. Korb, O., T. Stutzle, and T.E. Exner, *Empirical scoring functions for advanced protein-ligand*  
883 *docking with PLANTS*. Journal of chemical information and modeling, 2009. **49**(1): p. 84-96.
- 884 53. Byrne, D.P., et al., *cAMP-dependent protein kinase (PKA) complexes probed by*  
885 *complementary differential scanning fluorimetry and ion mobility-mass spectrometry*. The  
886 Biochemical journal, 2016. **473**(19): p. 3159-75.
- 887 54. Rudolf, A.F., et al., *A comparison of protein kinases inhibitor screening methods using both*  
888 *enzymatic activity and binding affinity determination*. PloS one, 2014. **9**(6): p. e98800.
- 889 55. Dodson, C.A., et al., *A kinetic test characterizes kinase intramolecular and intermolecular*  
890 *autophosphorylation mechanisms*. Science signaling, 2013. **6**(282): p. ra54.
- 891 56. Caron, D., et al., *Mitotic phosphotyrosine network analysis reveals that tyrosine*  
892 *phosphorylation regulates Polo-like kinase 1 (PLK1)*. Science signaling, 2016. **9**(458): p.  
893 rs14.
- 894 57. Hsu, Y.R., et al., *Human keratinocyte growth factor recombinantly expressed in Chinese*  
895 *hamster ovary cells: isolation of isoforms and characterization of post-translational*  
896 *modifications*. Protein expression and purification, 1998. **12**(2): p. 189-200.
- 897 58. Esko, J.D., C. Bertozzi, and R.L. Schnaar, *Chemical Tools for Inhibiting Glycosylation*, in  
898 *Essentials of Glycobiology*, rd, et al., Editors. 2015: Cold Spring Harbor (NY). p. 701-712.
- 899 59. Armstrong, J.I. and C.R. Bertozzi, *Sulfotransferases as targets for therapeutic intervention*.  
900 Current opinion in drug discovery & development, 2000. **3**(5): p. 502-15.
- 901 60. Gschwendt, M., et al., *Rottlerin, a novel protein kinase inhibitor*. Biochemical and  
902 biophysical research communications, 1994. **199**(1): p. 93-8.
- 903 61. Davies, S.P., et al., *Specificity and mechanism of action of some commonly used protein*  
904 *kinase inhibitors*. The Biochemical journal, 2000. **351**(Pt 1): p. 95-105.
- 905 62. McGeary, R.P., et al., *Suramin: clinical uses and structure-activity relationships*. Mini  
906 reviews in medicinal chemistry, 2008. **8**(13): p. 1384-94.
- 907 63. Givens, J.F. and K.F. Manly, *Inhibition of RNA-directed DNA polymerase by*  
908 *aurintricarboxylic acid*. Nucleic acids research, 1976. **3**(2): p. 405-18.
- 909 64. Lackey, K., et al., *The discovery of potent cRaf1 kinase inhibitors*. Bioorganic & medicinal  
910 chemistry letters, 2000. **10**(3): p. 223-6.
- 911 65. McDonald, O., et al., *Aza-stilbenes as potent and selective c-RAF inhibitors*. Bioorganic &  
912 medicinal chemistry letters, 2006. **16**(20): p. 5378-83.
- 913 66. Karouliia, Z., E. Gavathiotis, and P.I. Poulikakos, *New perspectives for targeting RAF kinase*  
914 *in human cancer*. Nature reviews. Cancer, 2017. **17**(11): p. 676-691.
- 915 67. Arrowsmith, C.H., et al., *The promise and peril of chemical probes*. Nature chemical biology,  
916 2015. **11**(8): p. 536-41.

- 917 68. Hall-Jackson, C.A., et al., *Paradoxical activation of Raf by a novel Raf inhibitor*. Chemistry  
918 & biology, 1999. **6**(8): p. 559-68.
- 919 69. Poulikakos, P.I., et al., *RAF inhibitor resistance is mediated by dimerization of aberrantly*  
920 *spliced BRAF(V600E)*. Nature, 2011. **480**(7377): p. 387-90.
- 921 70. Williams, T.E., et al., *Discovery of RAF265: A Potent mut-B-RAF Inhibitor for the Treatment*  
922 *of Metastatic Melanoma*. ACS medicinal chemistry letters, 2015. **6**(9): p. 961-5.
- 923 71. Izar, B., et al., *A first-in-human phase I, multicenter, open-label, dose-escalation study of the*  
924 *oral RAF/VEGFR-2 inhibitor (RAF265) in locally advanced or metastatic melanoma*  
925 *independent from BRAF mutation status*. Cancer medicine, 2017. **6**(8): p. 1904-1914.
- 926 72. Hunter, T., *Synthetic peptide substrates for a tyrosine protein kinase*. The Journal of  
927 biological chemistry, 1982. **257**(9): p. 4843-8.
- 928 73. Baldwin, G.S., J. Knesel, and J.M. Monckton, *Phosphorylation of gastrin-17 by epidermal*  
929 *growth factor-stimulated tyrosine kinase*. Nature, 1983. **301**(5899): p. 435-7.
- 930 74. Yang, Y.S., et al., *Tyrosine sulfation as a protein post-translational modification*. Molecules,  
931 2015. **20**(2): p. 2138-64.
- 932 75. Rath, V.L., D. Verdugo, and S. Hemmerich, *Sulfotransferase structural biology and inhibitor*  
933 *discovery*. Drug discovery today, 2004. **9**(23): p. 1003-11.
- 934 76. Li, Y., et al., *Heparin binding preference and structures in the fibroblast growth factor family*  
935 *parallel their evolutionary diversification*. Open biology, 2016. **6**(3).
- 936 77. Bailey, F.P., et al., *The Tribbles 2 (TRB2) pseudokinase binds to ATP and autophosphorylates*  
937 *in a metal-independent manner*. The Biochemical journal, 2015. **467**(1): p. 47-62.
- 938 78. Milani, M., et al., *DRP-1 is required for BH3 mimetic-mediated mitochondrial fragmentation*  
939 *and apoptosis*. Cell death & disease, 2017. **8**(1): p. e2552.
- 940 79. Hay, D.A., et al., *Discovery and optimization of small-molecule ligands for the CBP/p300*  
941 *bromodomains*. Journal of the American Chemical Society, 2014. **136**(26): p. 9308-19.
- 942 80. Bourdineaud, J.P., et al., *Enzymatic radiolabelling to a high specific activity of legume lipo-*  
943 *oligosaccharidic nodulation factors from Rhizobium meliloti*. The Biochemical journal, 1995.  
944 **306** ( Pt 1): p. 259-64.
- 945 81. Armstrong, J.I., et al., *Discovery of Carbohydrate Sulfotransferase Inhibitors from a Kinase-*  
946 *Directed Library*. Angewandte Chemie, 2000. **39**(7): p. 1303-1306.
- 947 82. Evers, P.A., et al., *Use of a drug-resistant mutant of stress-activated protein kinase 2a/p38 to*  
948 *validate the in vivo specificity of SB 203580*. FEBS letters, 1999. **451**(2): p. 191-6.
- 949 83. Scutt, P.J., et al., *Discovery and exploitation of inhibitor-resistant aurora and polo kinase*  
950 *mutants for the analysis of mitotic networks*. The Journal of biological chemistry, 2009.  
951 **284**(23): p. 15880-93.
- 952 84. Sloane, D.A., et al., *Drug-resistant aurora A mutants for cellular target validation of the*  
953 *small molecule kinase inhibitors MLN8054 and MLN8237*. ACS chemical biology, 2010.  
954 **5**(6): p. 563-76.
- 955 85. Bailey, F.P., V.I. Andreev, and P.A. Evers, *The resistance tetrad: amino acid hotspots for*  
956 *kinome-wide exploitation of drug-resistant protein kinase alleles*. Methods in enzymology,  
957 2014. **548**: p. 117-46.
- 958 86. Bury, L., et al., *Plk4 and Aurora A cooperate in the initiation of acentriolar spindle assembly*  
959 *in mammalian oocytes*. The Journal of cell biology, 2017. **216**(11): p. 3571-3590.
- 960 87. Fabbro, D., *25 years of small molecular weight kinase inhibitors: potentials and limitations*.  
961 Molecular pharmacology, 2015. **87**(5): p. 766-75.
- 962 88. Ferguson, F.M. and N.S. Gray, *Kinase inhibitors: the road ahead*. Nature reviews. Drug  
963 discovery, 2018.
- 964 89. Dar, A.C., et al., *Chemical genetic discovery of targets and anti-targets for cancer*  
965 *polypharmacology*. Nature, 2012. **486**(7401): p. 80-4.
- 966 90. Klaeger, S., et al., *The target landscape of clinical kinase drugs*. Science, 2017. **358**(6367).
- 967 91. Huang, B.Y., et al., *High-Throughput Screening of Sulfated Proteins by Using a Genome-*  
968 *Wide Proteome Microarray and Protein Tyrosine Sulfation System*. Analytical chemistry,  
969 2017. **89**(6): p. 3278-3284.

970



Figure 1

**A**

3'-phosphoadenosine-5'-phosphosulphate (PAPS)

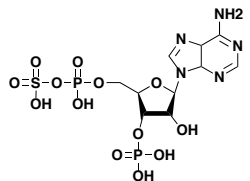

3'-phosphoadenosine-5'-phosphate (PAP)

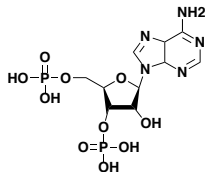

adenosine 5'-phosphosulphate (APS)

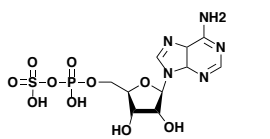

adenosine 5'-phosphate (ATP)

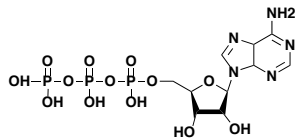

coenzyme A

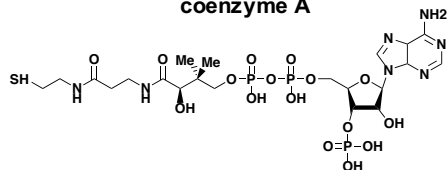

**B**

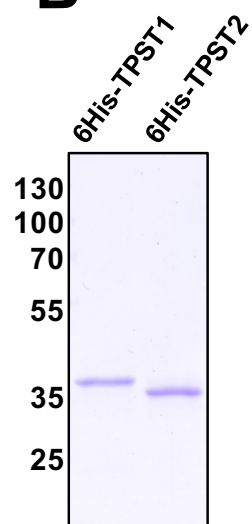

**C**

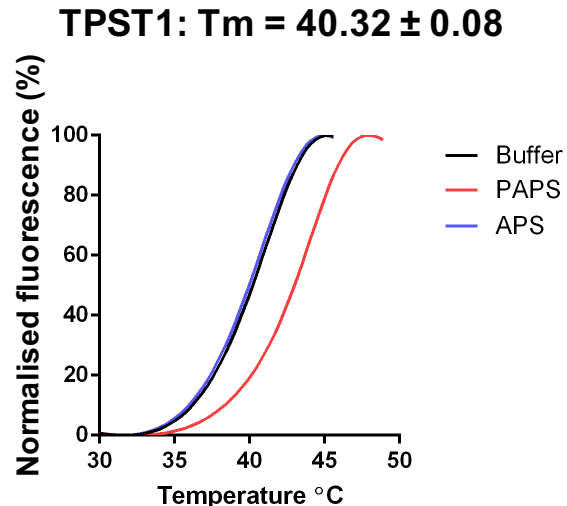

**D**

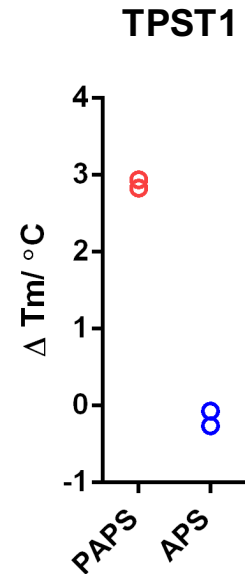

**E**

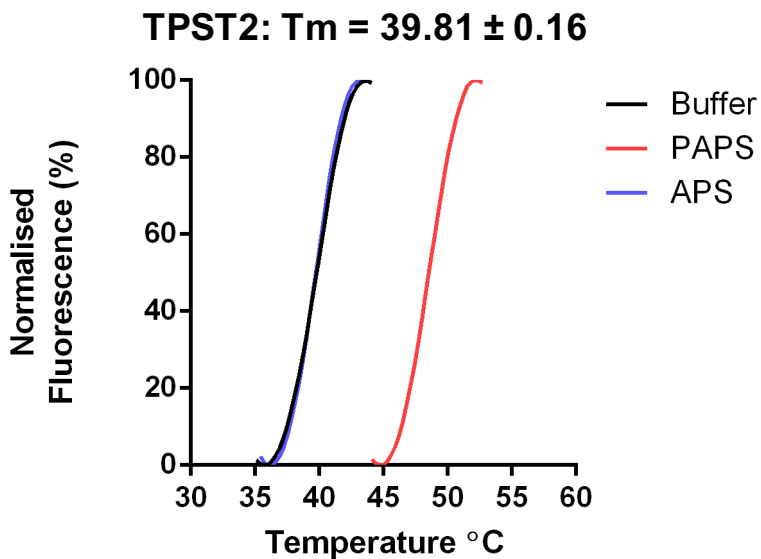

**F**

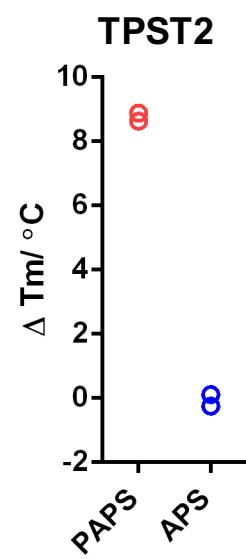

**G**

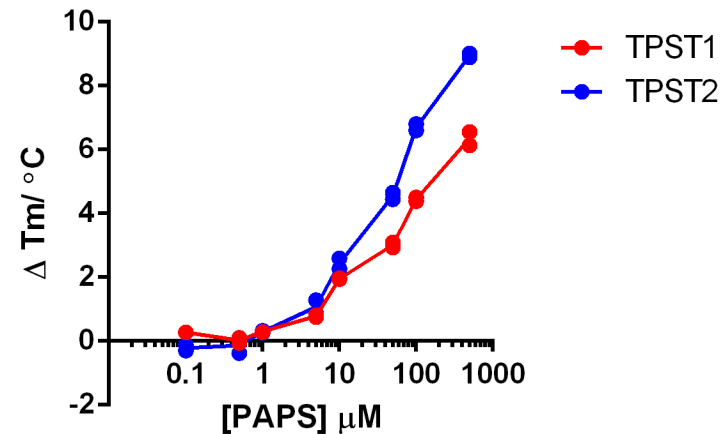

Figure 2

**A**

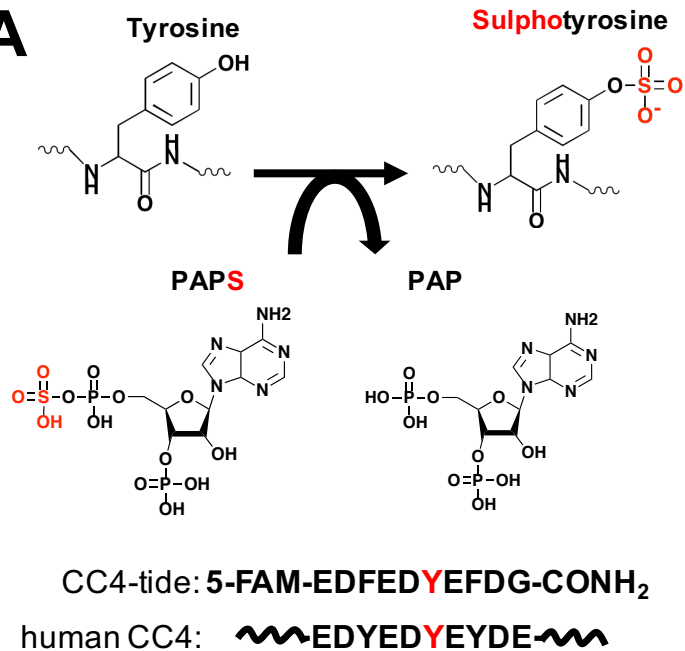

**C**

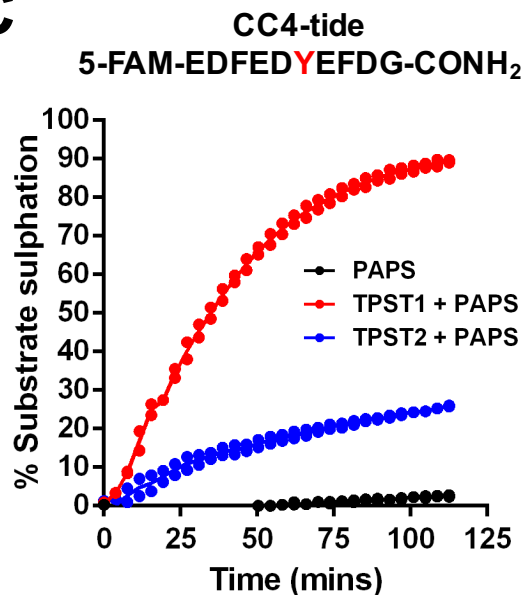

**D**

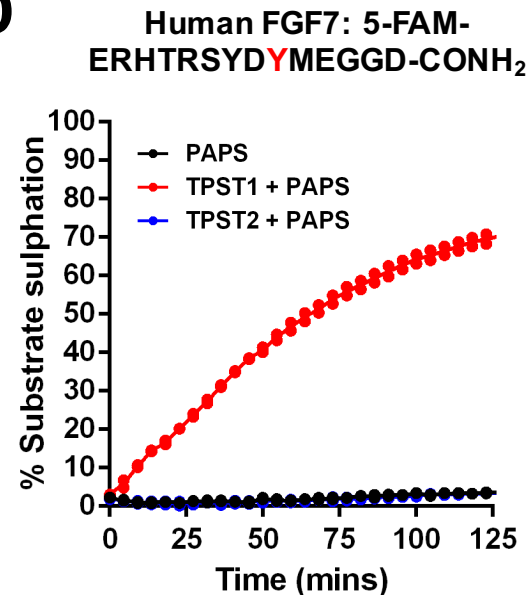

**B**

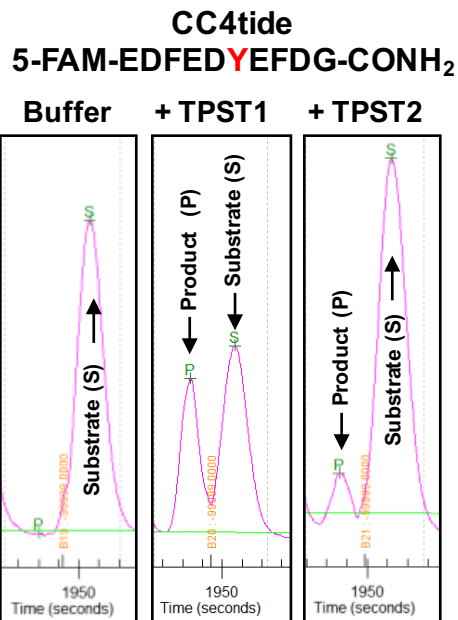

**E**

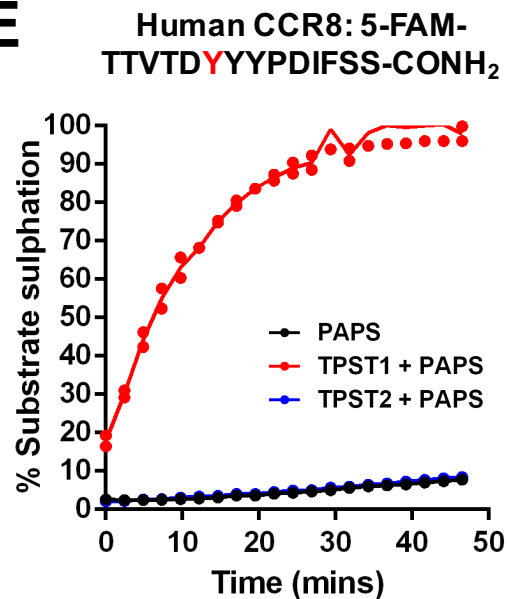

**F**

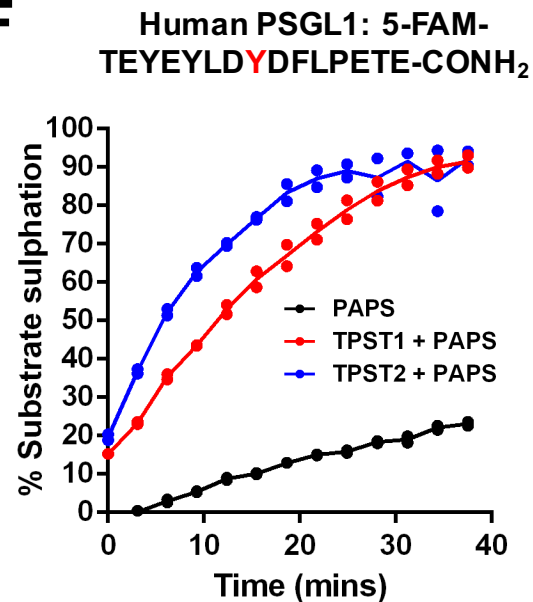

Figure 3

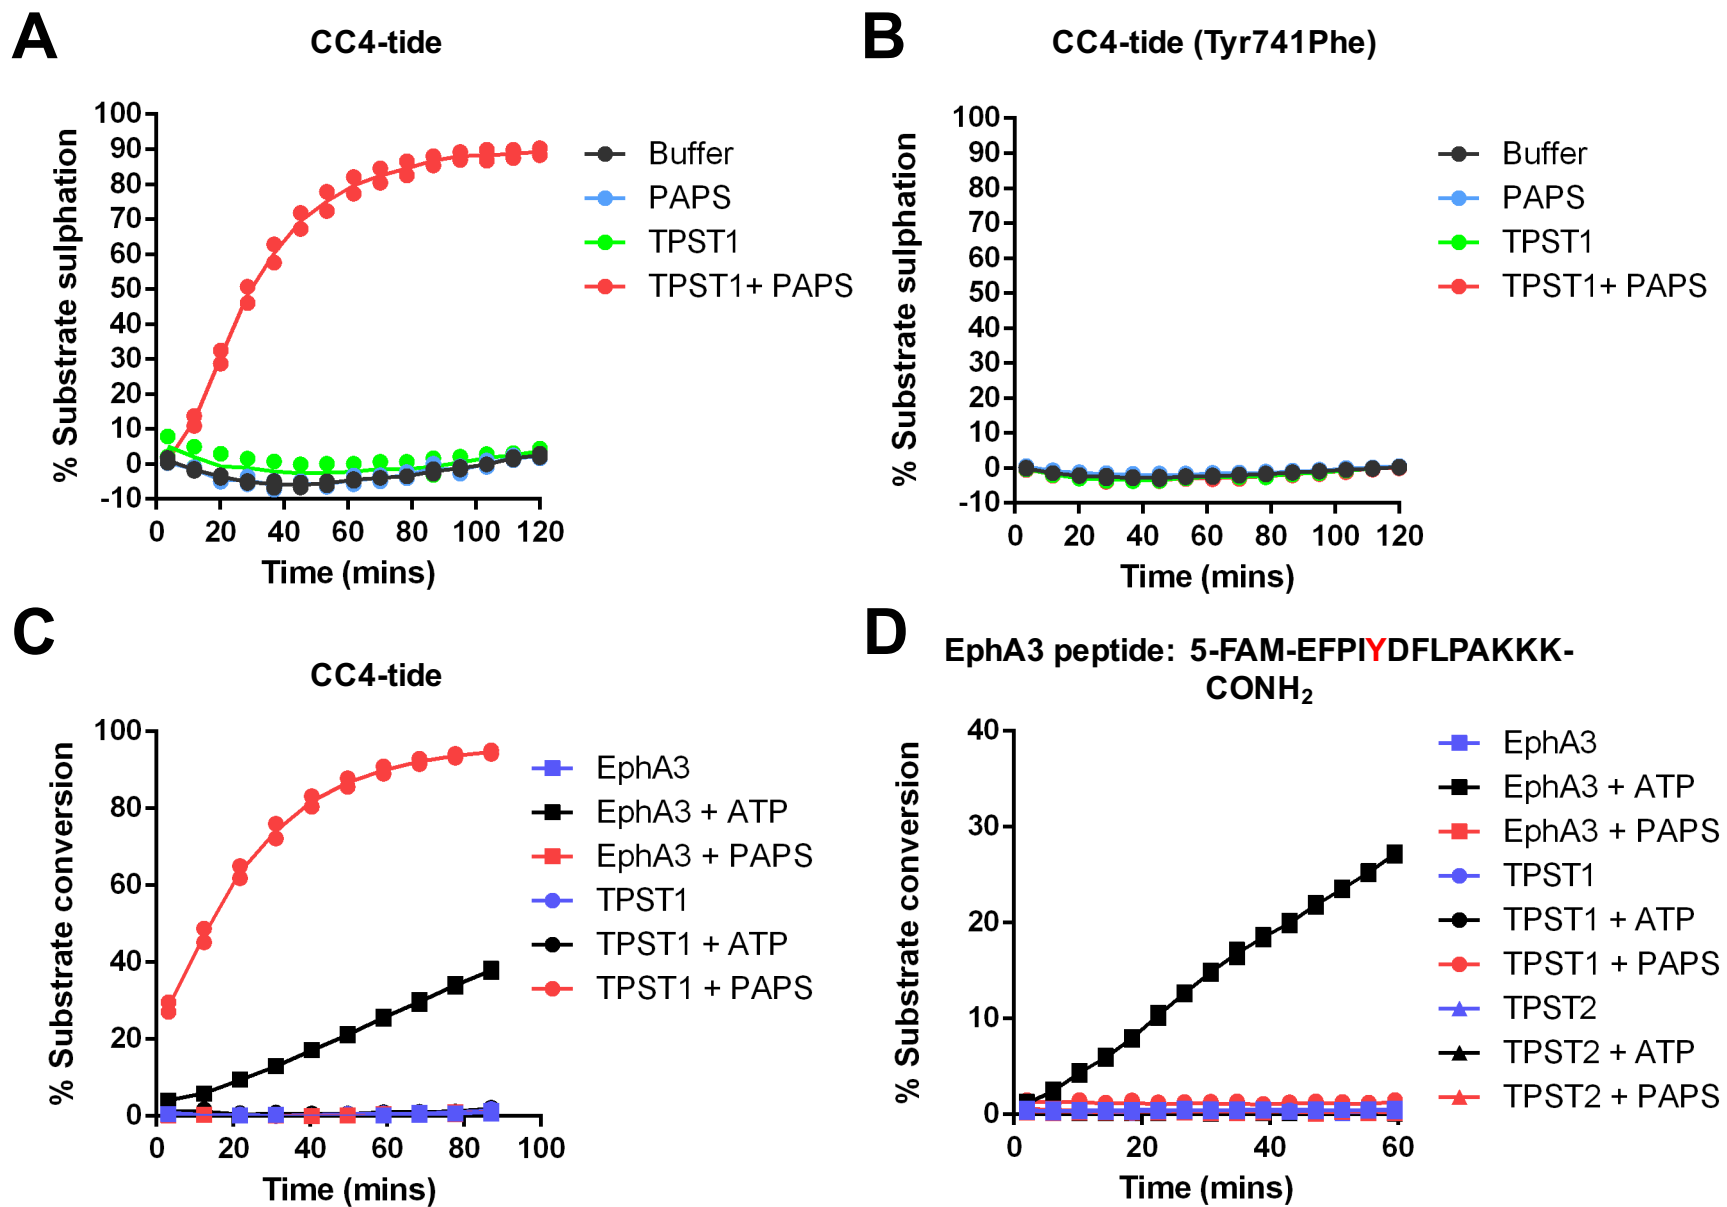



Figure 4

**A**

|         |   |   |   |   |   |   |   |   |
|---------|---|---|---|---|---|---|---|---|
| TPST1   | + | + | + | - | - | - | - | - |
| TPST2   | - | - | - | + | + | + | - | - |
| PAPS    | + | - | + | + | - | + | + | + |
| ATP     | - | + | - | - | + | - | - | - |
| GST-CC4 | + | + | - | + | + | - | + | - |
| GST     | - | - | + | - | - | + | - | + |

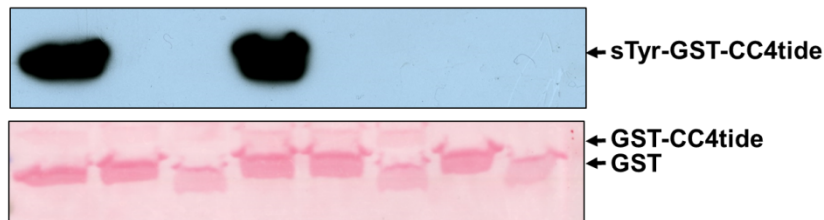

**B**

|       |                  |   |   |                   |   |   |
|-------|------------------|---|---|-------------------|---|---|
|       | <u>EDFEDYFDG</u> |   |   | <u>EDFEDFEFDG</u> |   |   |
| TPST1 | +                | - | - | +                 | - | - |
| TPST2 | -                | + | - | -                 | + | - |
| PAPS  | +                | + | + | +                 | + | + |

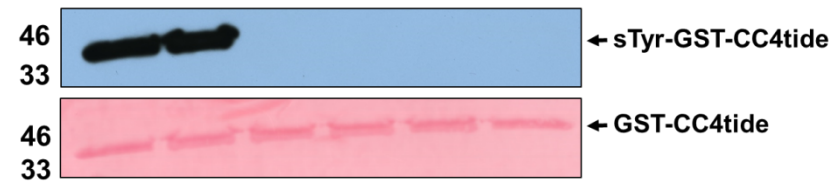

**C**

|         |   |   |   |   |   |   |
|---------|---|---|---|---|---|---|
| EphA3   | + | + | + | + | - | - |
| TPST1   | - | - | - | - | + | + |
| PAPS    | + | - | + | - | + | - |
| ATP     | - | + | - | + | - | + |
| GST-CC4 | + | + | - | - | + | + |
| GST     | - | - | + | + | - | - |

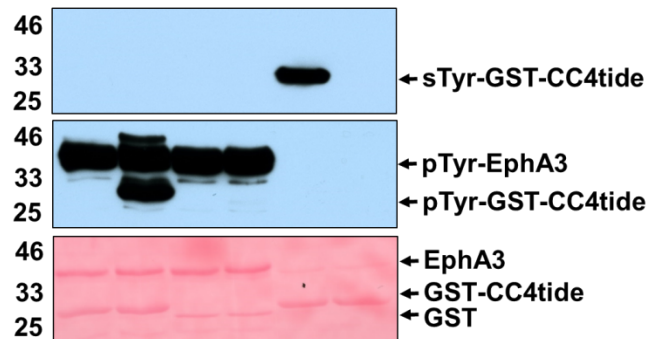

**D**

|       |                               |   |   |   |                              |   |   |   |
|-------|-------------------------------|---|---|---|------------------------------|---|---|---|
|       | <u>PAPS + Mg<sup>2+</sup></u> |   |   |   | <u>ATP + Mg<sup>2+</sup></u> |   |   |   |
| TPST1 | +                             | - | + | - | +                            | - | + | - |
| TPST2 | -                             | + | + | - | -                            | + | + | - |

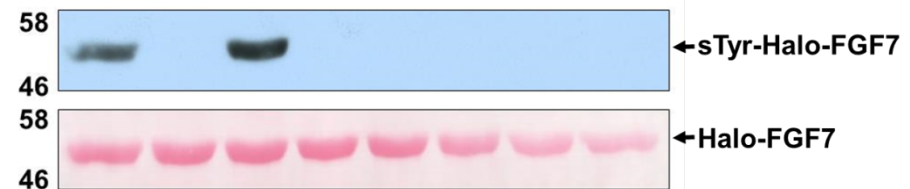

Figure 5

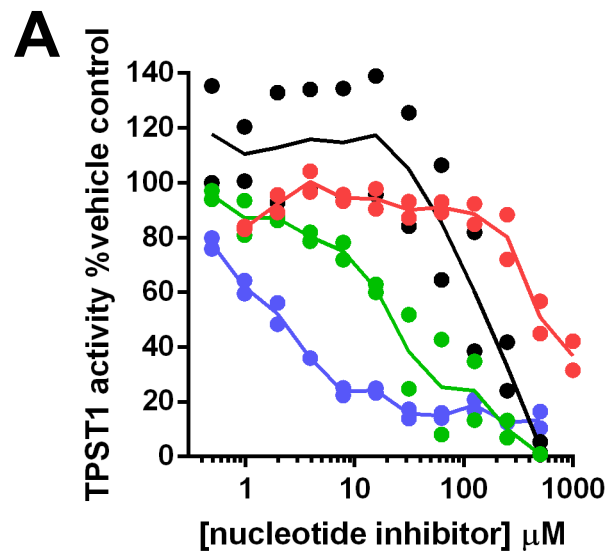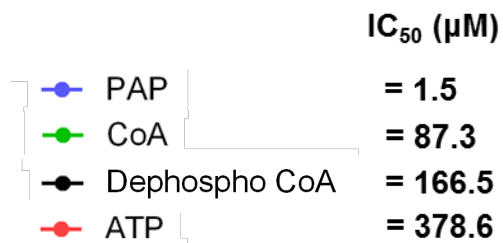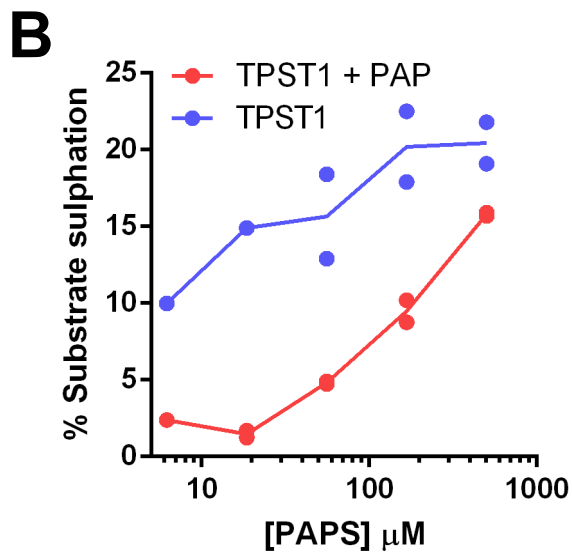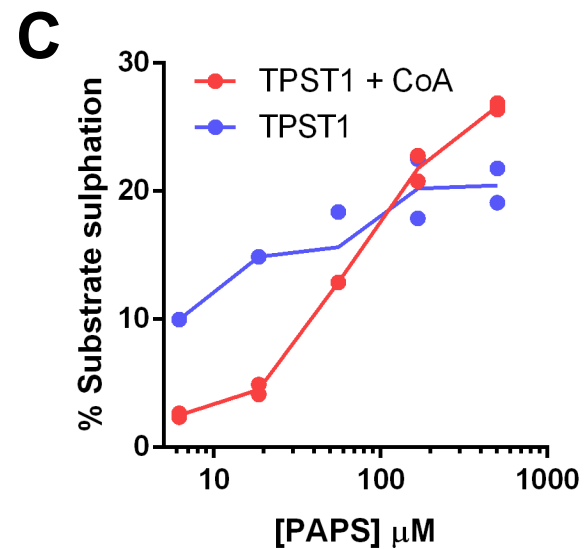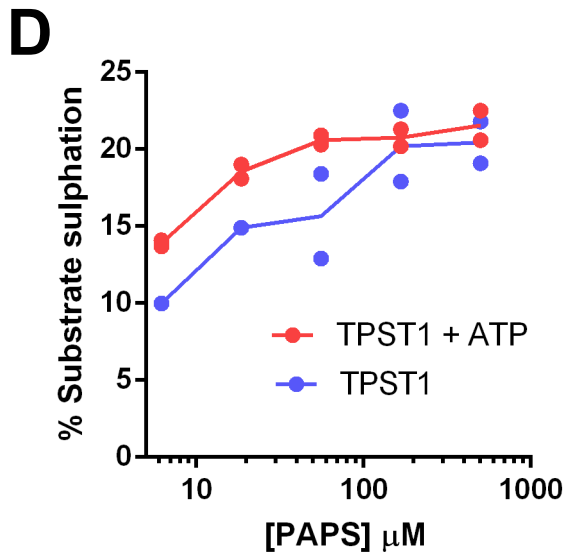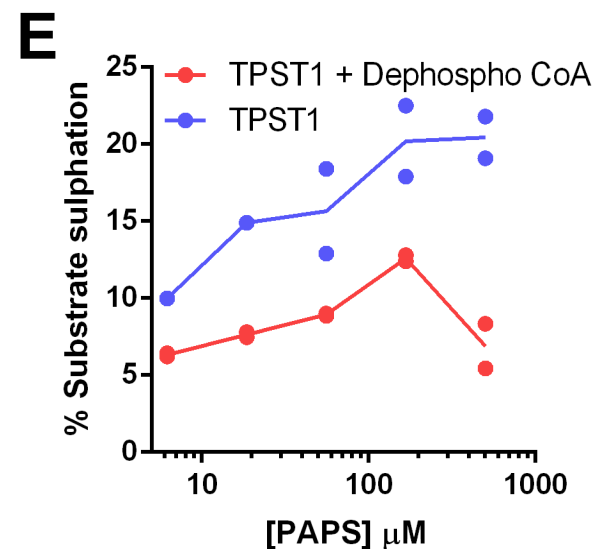

Figure 6

**A**

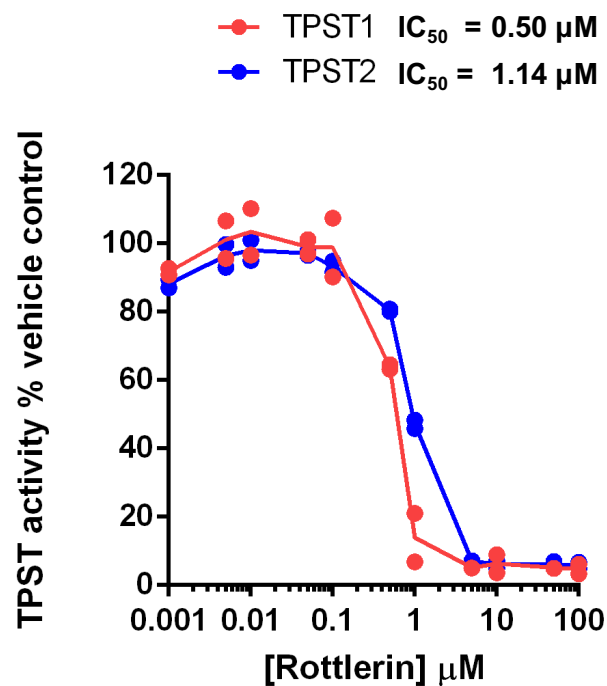

**B**

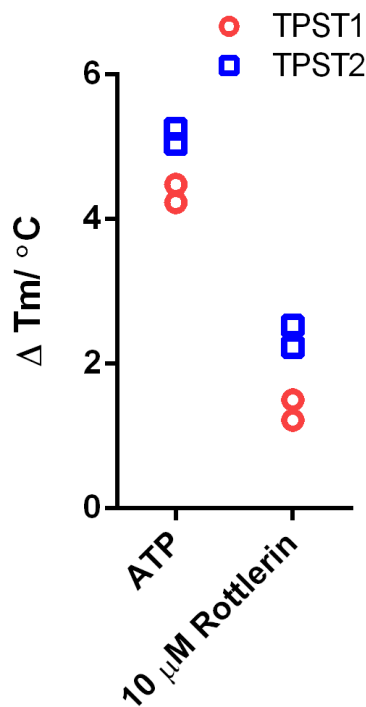

**C**

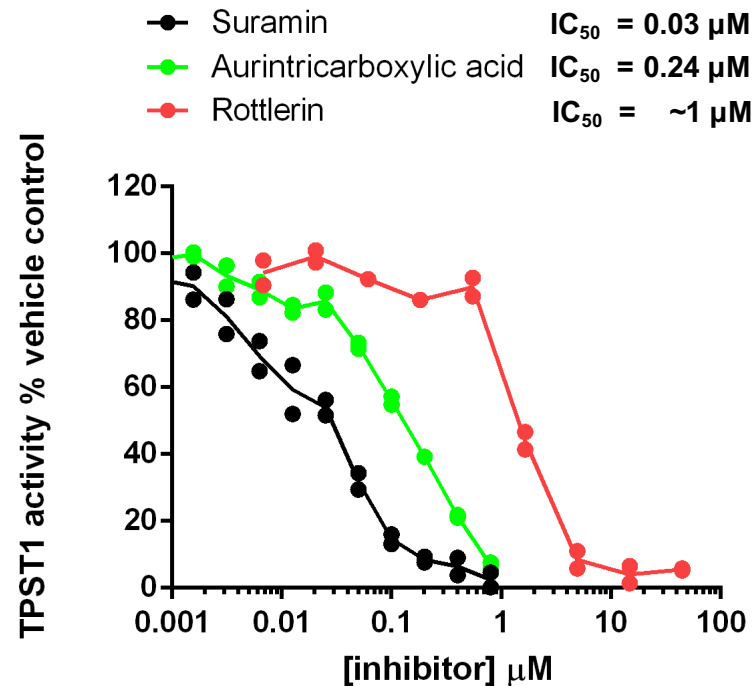

Figure 7

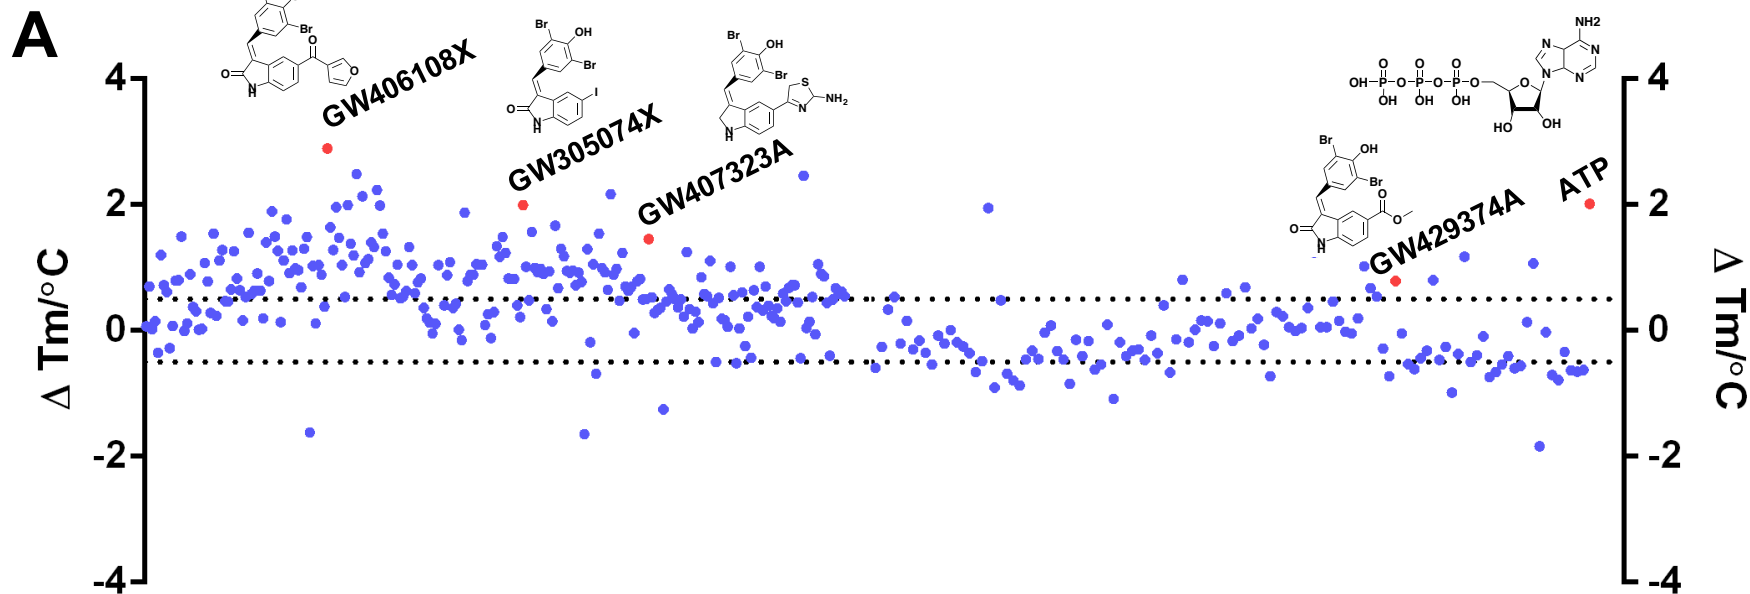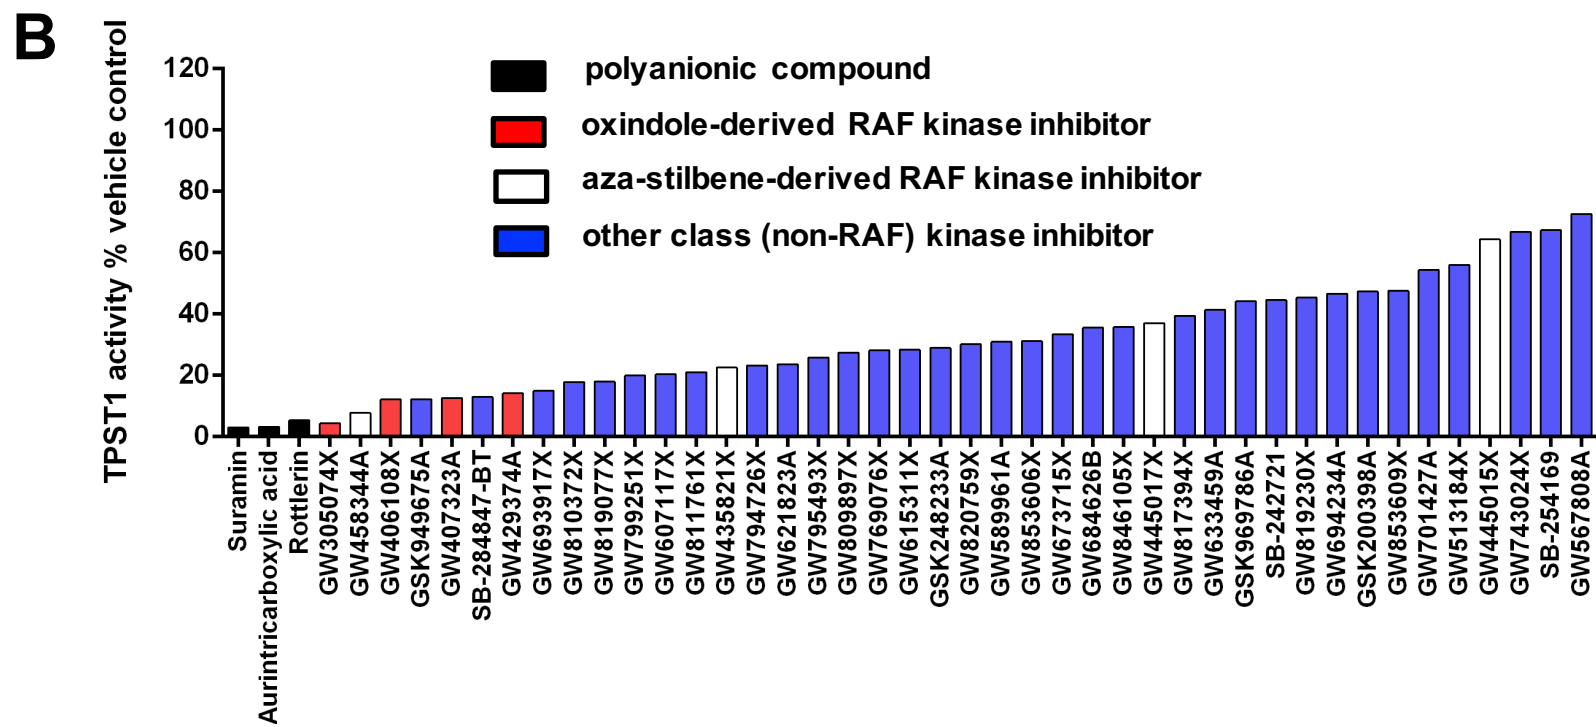

Figure 7 continued

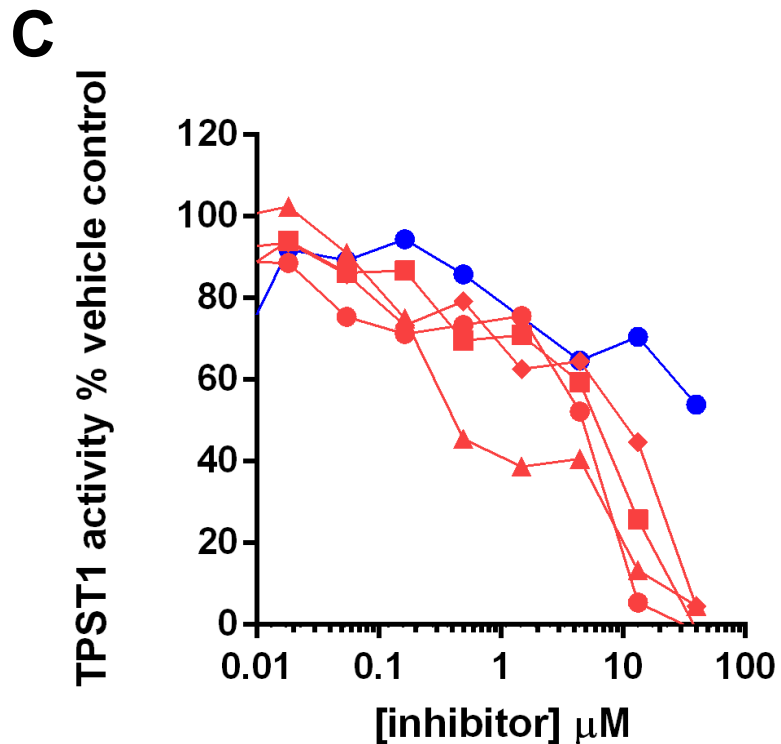

- ▲ GW305074X  $\text{IC}_{50} = 0.60 \mu\text{M}$
- GW407323A  $\text{IC}_{50} = 6.0 \mu\text{M}$
- GW429374A  $\text{IC}_{50} = 9.8 \mu\text{M}$
- ◆ GW406108X  $\text{IC}_{50} = 16.0 \mu\text{M}$
- GW405841X  $\text{IC}_{50} = > 40 \mu\text{M}$

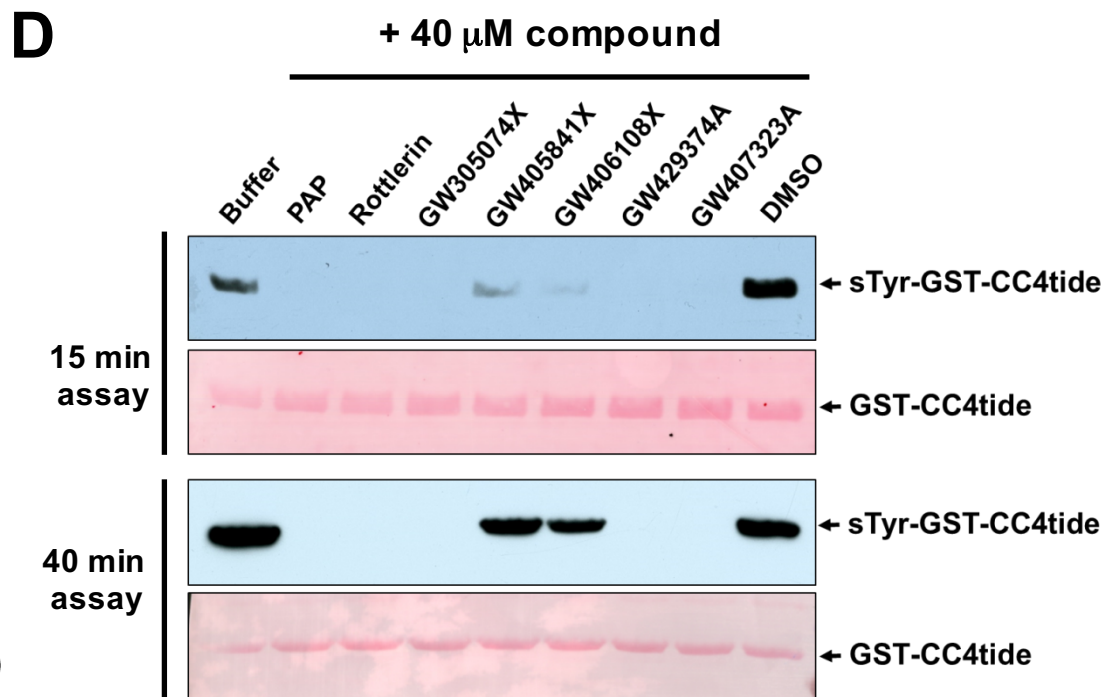

Figure 8

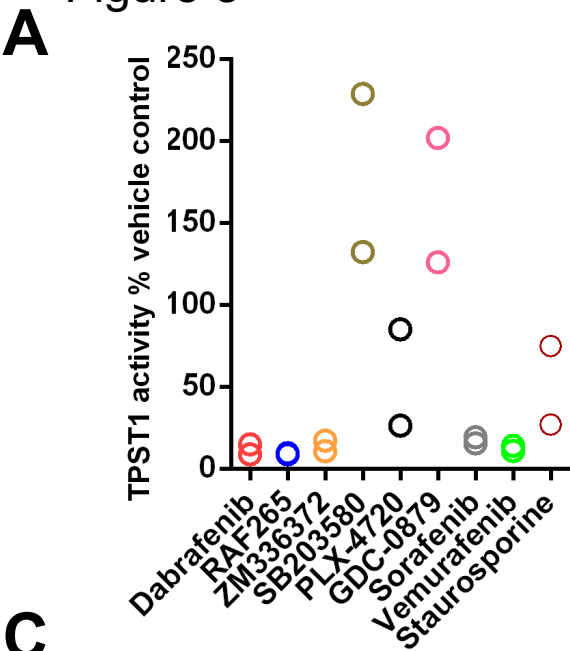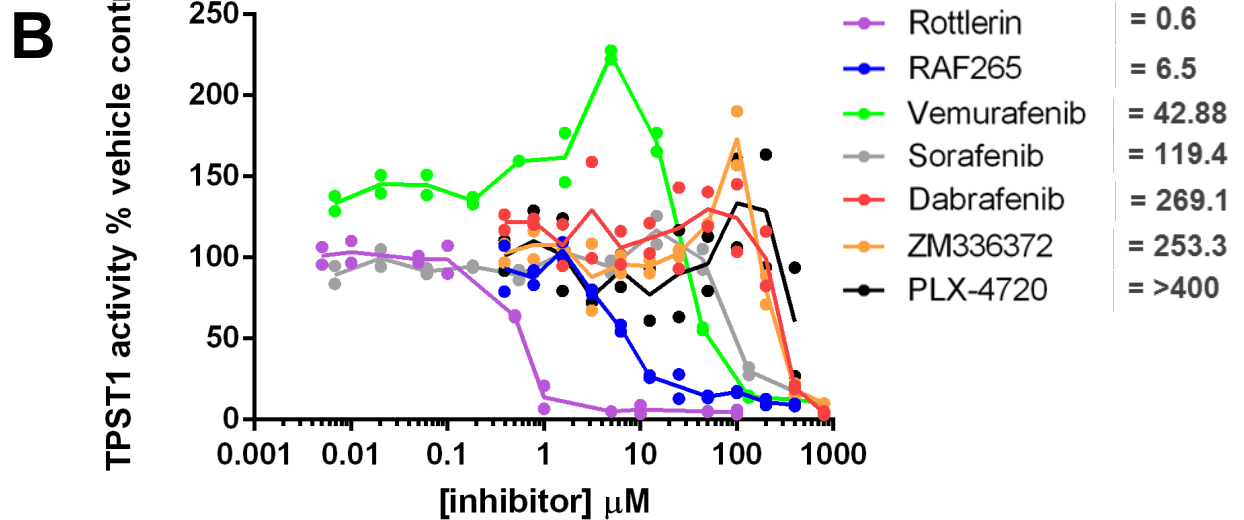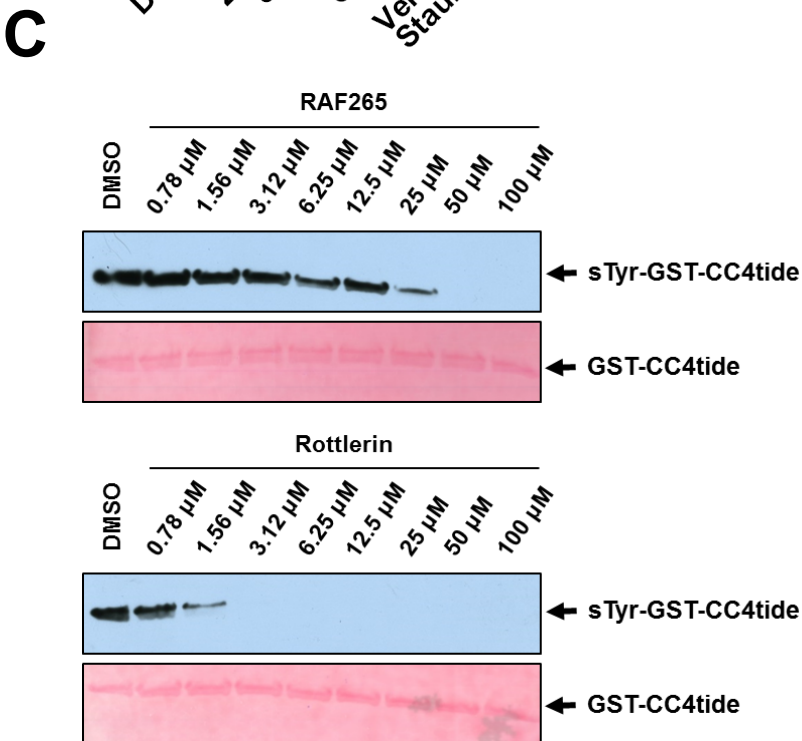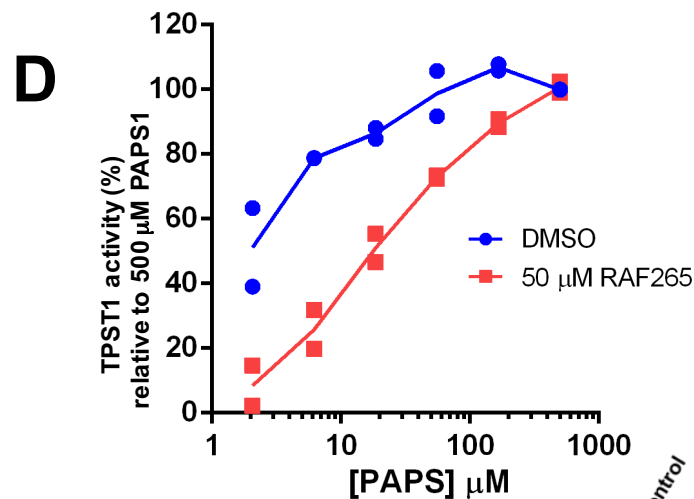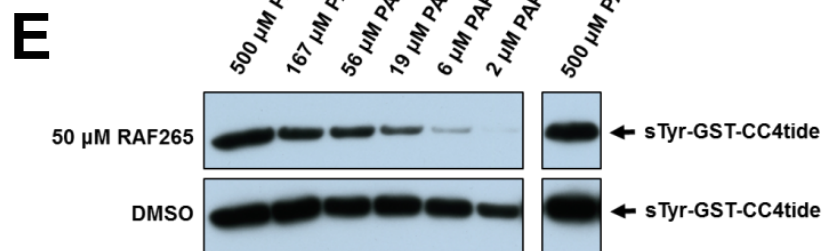

Figure 9

TPST1 active site (PDB ID:5WRI)

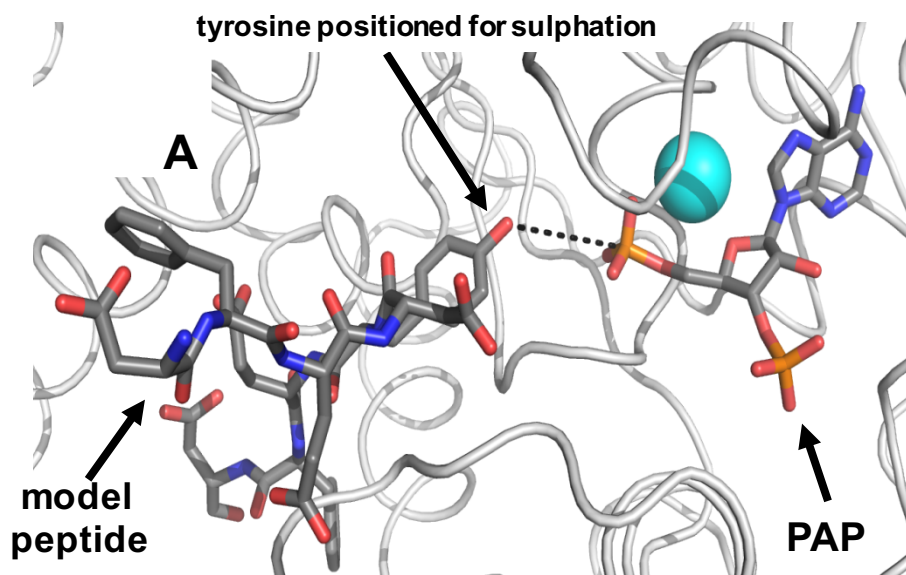

TPST1:PAP complex

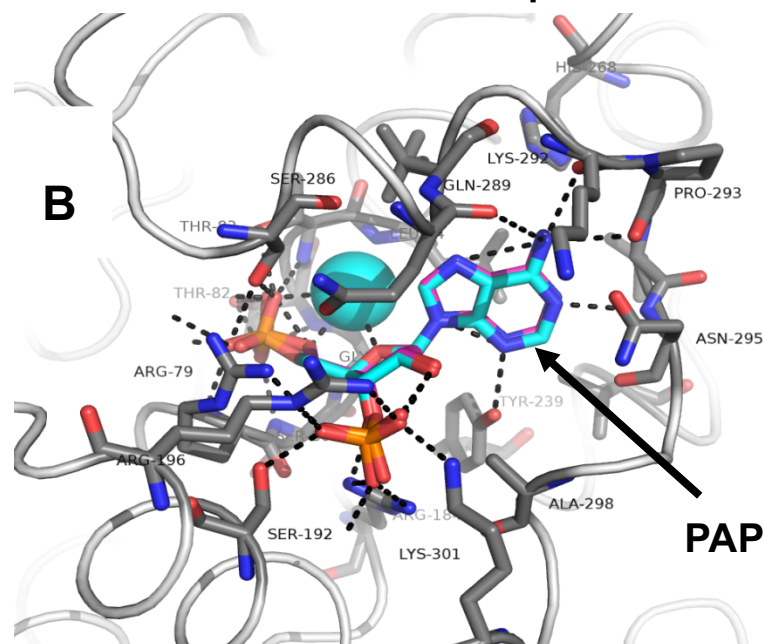

**C**

rottlerin

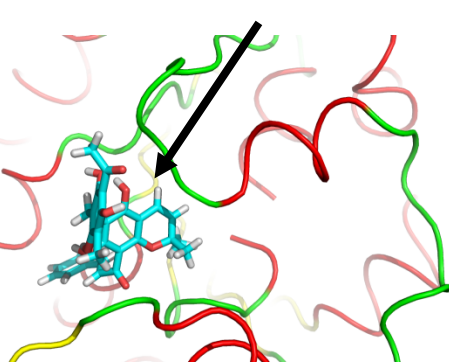

peptide-binding site

**D**

GW305074X

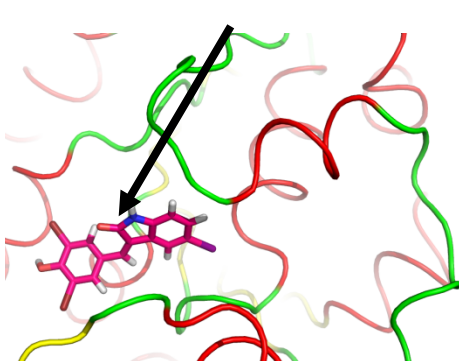

peptide-binding site

**E**

suramin

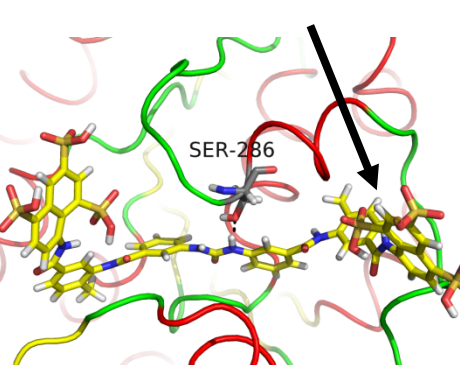

peptide:PAPS-binding sites

**F**

RAF265

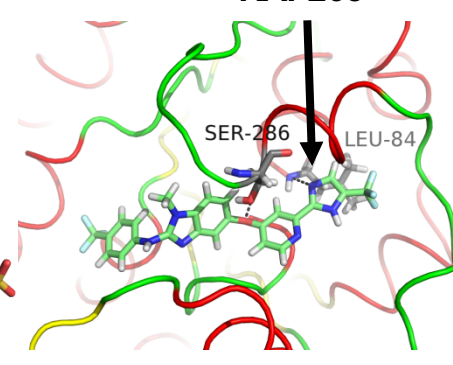

peptide:PAPS-binding sites

Supplementary Figure 1

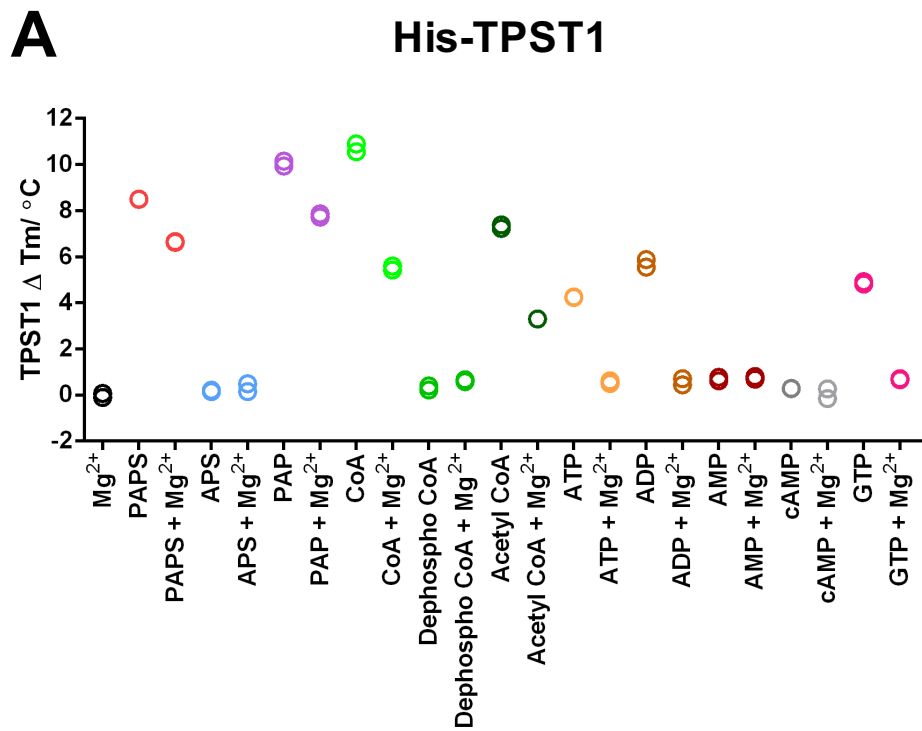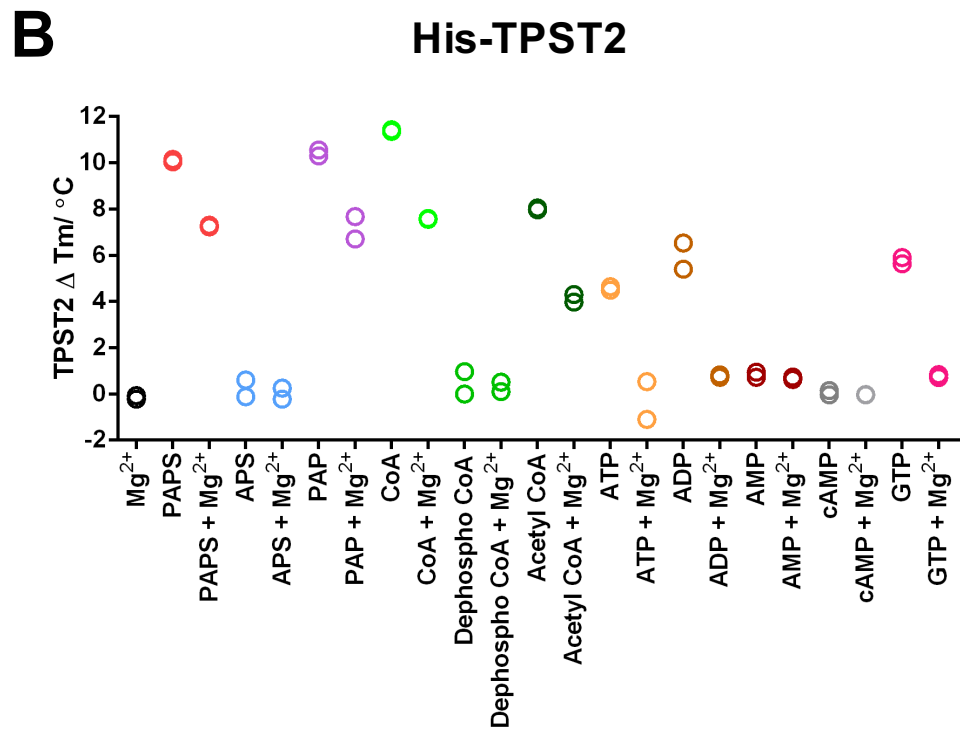



Supplementary Figure 2

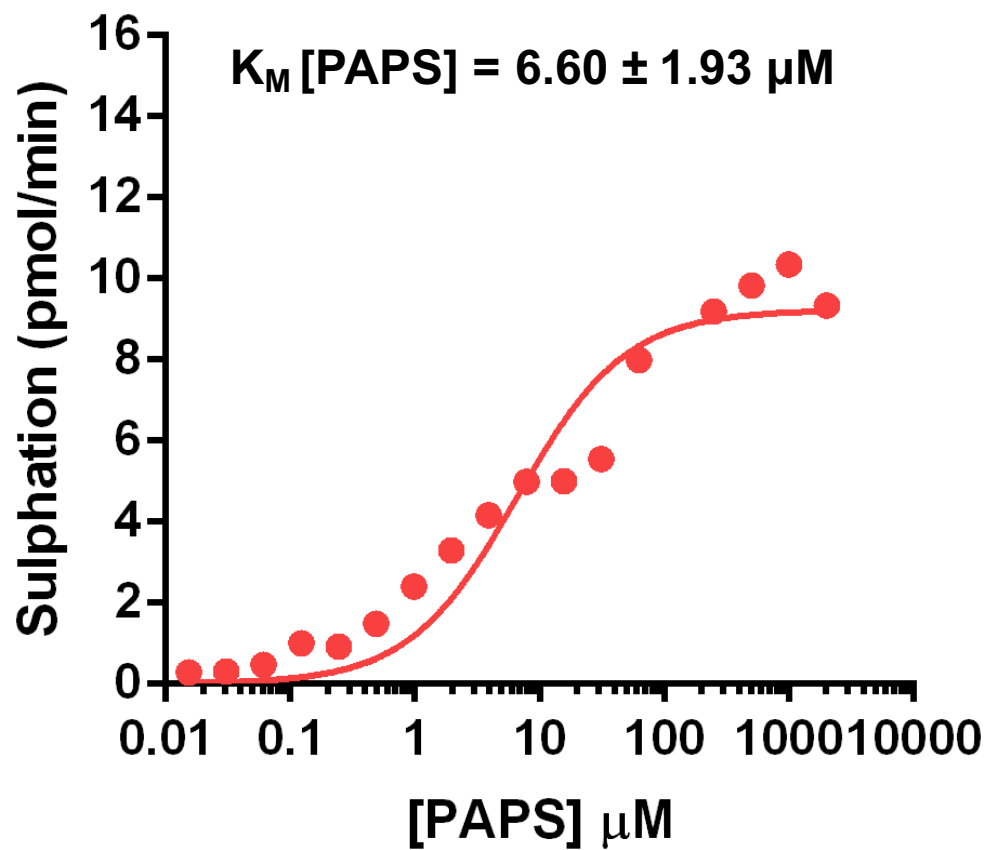

Supplementary Figure 3

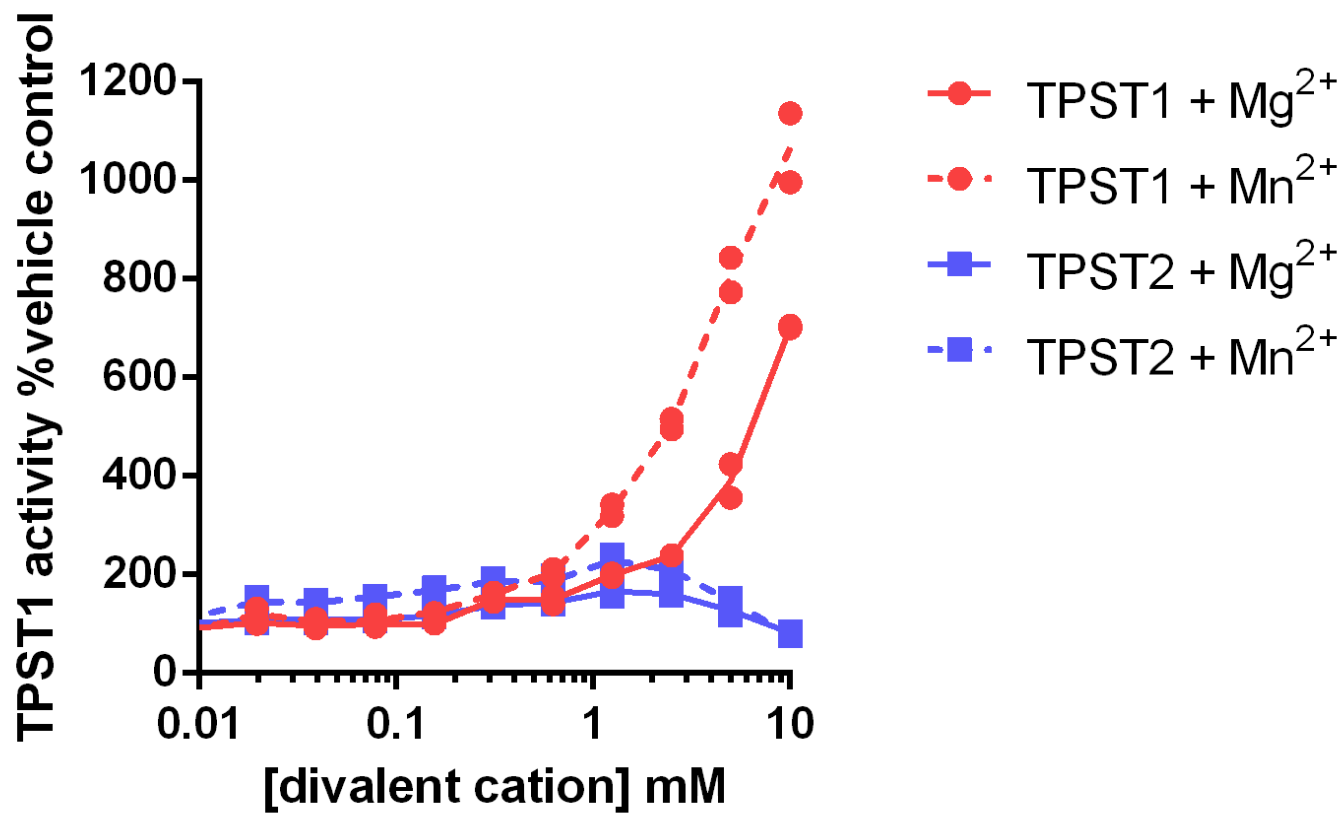

# Supplementary Figure 4

**rottlerin**

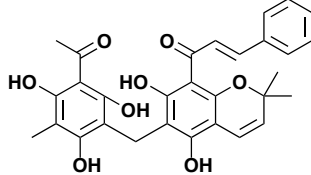

**suramin**

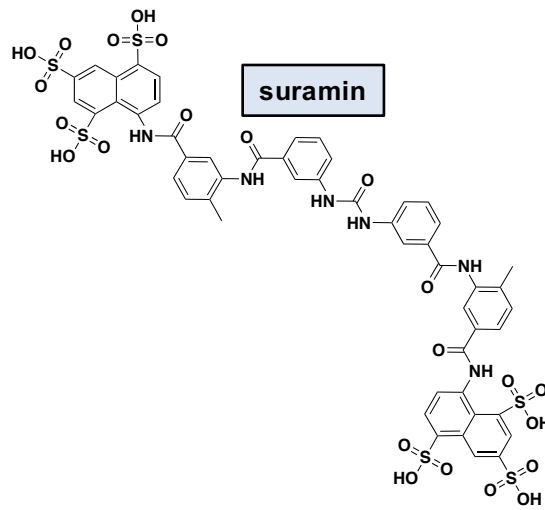

**aurintricarboxylate**

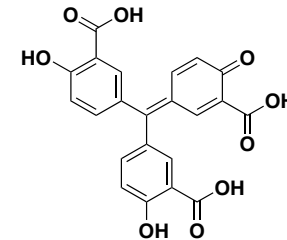

**GW407323A**

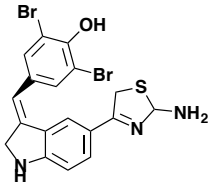

**GW429374A**

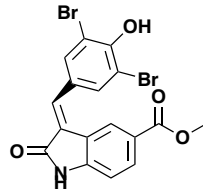

**GW406108X**

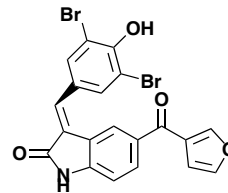

**GW305074X**

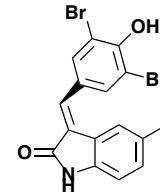

**GW405841X**

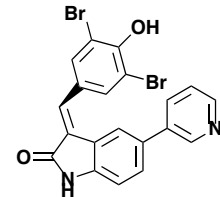

**GW458344A**

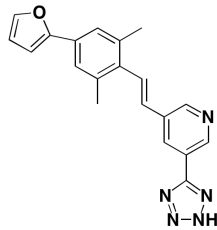

**GW435821X**

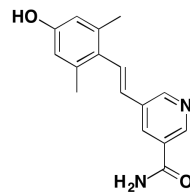

**GW445017X**

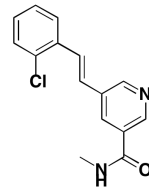

**GW445015X**

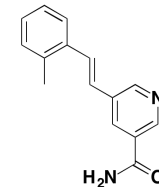

**RAF265**

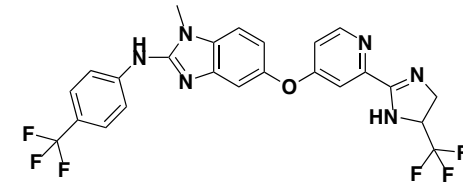

**vemurafenib**

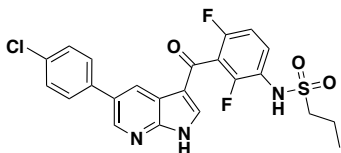

**sorafenib**

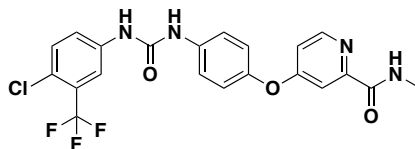

**ZM336372**

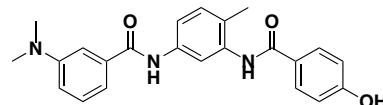

**dabrafenib**

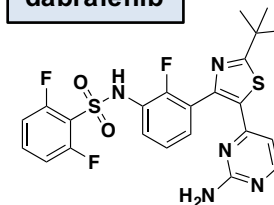

**PLX-4720**

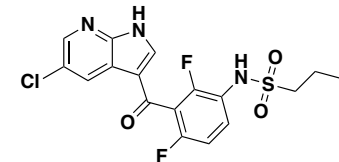

Source: https://www.biorxiv.org/content/10.1101/296707v1.full.pdf
